# Supplementary material for: An Insight into miR-1290: An Oncogenic miRNA with Diagnostic Potential
Source: MDPI journal article supplement (doi:10.3390/ijms23031234), 2022-01-22
Supplement: s1 [file s1]

**Supplementary Table S1.** MiR-1290 target genes predicted with miRWalk 3.0 and miRDB.

| Gene symbol | Entrez ID | Description                                                                                              |
|-------------|-----------|----------------------------------------------------------------------------------------------------------|
| A1CF        | 29974     | Homo sapiens APOBEC1 complementation factor (A1CF), transcript variant 4, mRNA.                          |
| ABCC4       | 10257     | Homo sapiens ATP binding cassette subfamily C member 4 (ABCC4), transcript variant 2, mRNA.              |
| ABLM1       | 3983      | Homo sapiens actin binding LIM protein 1 (ABLM1), transcript variant 2, mRNA.                            |
| ACSL4       | 2182      | Homo sapiens acyl-CoA synthetase long chain family member 4 (ACSL4), transcript variant 3, mRNA.         |
| ADARB2      | 105       | Homo sapiens adenosine deaminase RNA specific B2 (inactive)(ADARB2), mRNA.                               |
| AGO1        | 26523     | Homo sapiens argonaute RISC component 1 (AGO1), transcript variant1, mRNA.                               |
| AKR7A2      | 8574      | Homo sapiens aldo-keto reductase family 7 member A2 (AKR7A2), transcript variant 2, mRNA.                |
| ANK2        | 287       | Homo sapiens ankyrin 2 (ANK2), transcript variant 3, mRNA.                                               |
| ANKRD12     | 23253     | Homo sapiens ankyrin repeat domain 12 (ANKRD12), transcript variant2, mRNA.                              |
| ANKRD42     | 338699    | Homo sapiens ankyrin repeat domain 42 (ANKRD42), transcript variant3, mRNA.                              |
| ANTXR2      | 118429    | Homo sapiens ANTXR cell adhesion molecule 2 (ANTXR2), transcript variant 2, mRNA.                        |
| AP3B1       | 8546      | Homo sapiens adaptor related protein complex 3 subunit beta 1(AP3B1), transcript variant 2, mRNA.        |
| ARHGAP17    | 55114     | Homo sapiens Rho GTPase activating protein 17 (ARHGAP17), transcript variant 1, mRNA.                    |
| ARHGAP5     | 394       | Homo sapiens Rho GTPase activating protein 5 (ARHGAP5), transcript variant 1, mRNA.                      |
| ARID4B      | 51742     | Homo sapiens AT-rich interaction domain 4B (ARID4B), transcript variant 3, mRNA.                         |
| ASXL3       | 80816     | Homo sapiens ASXL transcriptional regulator 3 (ASXL3), mRNA.                                             |
| ATF1        | 466       | Homo sapiens activating transcription factor 1 (ATF1), mRNA.                                             |
| ATF7IP      | 55729     | Homo sapiens activating transcription factor 7 interacting protein (ATF7IP), transcript variant 3, mRNA. |
| ATP2B1      | 490       | Homo sapiens ATPase plasma membrane Ca2+ transporting 1 (ATP2B1), transcript variant 1, mRNA.            |
| ATP7B       | 540       | Homo sapiens ATPase copper transporting beta (ATP7B), transcript variant 1, mRNA.                        |
| ATXN1       | 6310      | Homo sapiens ataxin 1 (ATXN1), transcript variant 1, mRNA.                                               |
| BBS9        | 27241     | Homo sapiens Bardet-Biedl syndrome 9 (BBS9), transcript variant 3, mRNA.                                 |
| BBX         | 56987     | Homo sapiens BBX high mobility group box domain containing (BBX), transcript variant 1, mRNA.            |
| BEND4       | 389206    | Homo sapiens BEN domain containing 4 (BEND4), transcript variant 2, mRNA.                                |
| BICD2       | 23299     | Homo sapiens BICD cargo adaptor 2 (BICD2), transcript variant 1, mRNA.                                   |
| BMP3        | 651       | Homo sapiens bone morphogenetic protein 3 (BMP3), mRNA.                                                  |
| BNC2        | 54796     | Homo sapiens basonuclin 2 (BNC2), transcript variant 2, mRNA.                                            |
| BRWD1       | 54014     | Homo sapiens bromodomain and WD repeat domain containing 1 (BRWD1), transcript variant 3, mRNA.          |
| BTD         | 686       | Homo sapiens biotinidase (BTD), transcript variant 1, mRNA.                                              |
| C1orf52     | 148423    | Homo sapiens chromosome 1 open reading frame 52 (C1orf52), transcript variant 1, mRNA.                   |
| CACNB4      | 785       | Homo sapiens calcium voltage-gated channel auxiliary subunit beta 4(CACNB4), transcript variant 2, mRNA. |
| CALCR       | 799       | Homo sapiens calcitonin receptor (CALCR), transcript variant 1, mRNA.                                    |
| CAMK2A      | 815       | Homo sapiens calcium/calmodulin dependent protein kinase II alpha (CAMK2A), transcript variant 3, mRNA.  |
| CAMK4       | 814       | Homo sapiens calcium/calmodulin dependent protein kinase IV(CAMK4), transcript variant 2, mRNA.          |
| CAPN2       | 824       | Homo sapiens calpain 2 (CAPN2), transcript variant 2, mRNA.                                              |
| CBFA2T3     | 863       | Homo sapiens CBFA2/RUNX1 partner transcriptional co-repressor 3(CBFA2T3), transcript variant 1, mRNA.    |
| CCDC141     | 285025    | Homo sapiens coiled-coil domain containing 141 (CCDC141), transcript variant 2, mRNA.                    |
| CCDC142     | 84865     | Homo sapiens coiled-coil domain containing 142 (CCDC142), transcript variant 1, mRNA.                    |
| CCDC186     | 55088     | Homo sapiens coiled-coil domain containing 186 (CCDC186), transcript variant 3, mRNA.                    |
| CCPG1       | 9236      | Homo sapiens cell cycle progression 1 (CCPG1), transcript variant3, mRNA.                                |
| CD164       | 8763      | Homo sapiens CD164 molecule (CD164), transcript variant 2, mRNA.                                         |
| CD1E        | 913       | Homo sapiens CD1e molecule (CD1E), transcript variant 2, mRNA.                                           |
| CD4         | 920       | Homo sapiens CD4 molecule (CD4), transcript variant 1, mRNA.                                             |
| CDC5L       | 988       | Homo sapiens cell division cycle 5 like (CDC5L), mRNA.                                                   |
| CDYL2       | 124359    | Homo sapiens chromodomain Y like 2 (CDYL2), mRNA.                                                        |
| CHN2        | 1124      | Homo sapiens chimerin 2 (CHN2), transcript variant 1, mRNA.                                              |
| CHST11      | 50515     | Homo sapiens carbohydrate sulfotransferase 11 (CHST11), transcript variant 2, mRNA.                      |
| CHTF8       | 54921     | Homo sapiens chromosome transmission fidelity factor 8 (CHTF8), transcript variant 1, mRNA.              |
| CLIP3       | 25999     | Homo sapiens CAP-Gly domain containing linker protein 3 (CLIP3), transcript variant 1, mRNA.             |
| CNOT7       | 29883     | Homo sapiens CCR4-NOT transcription complex subunit 7 (CNOT7), transcript variant 3, mRNA.               |
| CNTN6       | 27255     | Homo sapiens contactin 6 (CNTN6), transcript variant 2, mRNA.                                            |
| COA8        | 84334     | Homo sapiens cytochrome c oxidase assembly factor 8 (COA8), transcript variant 2, mRNA.                  |
| COL21A1     | 81578     | Homo sapiens collagen type XXI alpha 1 chain (COL21A1), transcript variant 2, mRNA.                      |
| COLEC12     | 81035     | Homo sapiens collectin subfamily member 12 (COLEC12), mRNA.                                              |
| CPEB2       | 132864    | Homo sapiens cytoplasmic polyadenylation element binding protein 2(CPEB2), transcript variant C, mRNA.   |
| CREB5       | 9586      | Homo sapiens cAMP responsive element binding protein 5 (CREB5), transcript variant 4, mRNA.              |
| CSNK1G1     | 53944     | Homo sapiens casein kinase 1 gamma 1 (CSNK1G1), transcript variant2, mRNA.                               |
| CTDP1       | 9150      | Homo sapiens CTD phosphatase subunit 1 (CTDP1), transcript variant3, mRNA.                               |
| CTDSPL      | 10217     | Homo sapiens CTD small phosphatase like (CTDSPL), transcript variant 1, mRNA.                            |
| CTTNBP2NL   | 55917     | Homo sapiens CTTNBP2 N-terminal like (CTTNBP2NL), mRNA.                                                  |
| CUL2        | 8453      | Homo sapiens cullin 2 (CUL2), transcript variant 4, mRNA.                                                |
| CUL4A       | 8451      | Homo sapiens cullin 4A (CUL4A), transcript variant 1, mRNA.                                              |
| CXorf66     | 347487    | Homo sapiens chromosome X open reading frame 66 (CXorf66), mRNA.                                         |

|          |        |                                                                                                                      |
|----------|--------|----------------------------------------------------------------------------------------------------------------------|
| CYP4F11  | 57834  | Homo sapiens cytochrome P450 family 4 subfamily F member 11(CYP4F11), transcript variant 2, mRNA.                    |
| DCC      | 1630   | Homo sapiens DCC netrin 1 receptor (DCC), mRNA.                                                                      |
| DCX      | 1641   | Homo sapiens doublecortin (DCX), transcript variant 1, mRNA.                                                         |
| DHX33    | 56919  | Homo sapiens DEAH-box helicase 33 (DHX33), transcript variant 2, mRNA.                                               |
| DLG1     | 1739   | Homo sapiens discs large MAGUK scaffold protein 1 (DLG1), transcript variant 1, mRNA.                                |
| DNAJC12  | 56521  | Homo sapiens DnaJ heat shock protein family (Hsp40) member C12(DNAJC12), transcript variant 1, mRNA.                 |
| DTL      | 51514  | Homo sapiens denticleless E3 ubiquitin protein ligase homolog (DTL), transcript variant 2, mRNA.                     |
| DYNC1I1  | 1780   | Homo sapiens dynein cytoplasmic 1 intermediate chain 1 (DYNC1I1), transcript variant 2, mRNA.                        |
| DYRK1A   | 1859   | Homo sapiens dual specificity tyrosine phosphorylation regulated kinase 1A (DYRK1A), transcript variant 6, mRNA.     |
| EBF1     | 1879   | Homo sapiens EBF transcription factor 1 (EBF1), transcript variant1, mRNA.                                           |
| EGFR     | 1956   | Homo sapiens epidermal growth factor receptor (EGFR), transcript variant 5, mRNA.                                    |
| ELF5     | 2001   | Homo sapiens E74 like ETS transcription factor 5 (ELF5), transcript variant 3, mRNA.                                 |
| ELMOD2   | 255520 | Homo sapiens ELMO domain containing 2 (ELMOD2), mRNA.                                                                |
| EME1     | 146956 | Homo sapiens essential meiotic structure-specific endonuclease 1(EME1), transcript variant 1, mRNA.                  |
| ENSA     | 2029   | Homo sapiens endosulfine alpha (ENSA), transcript variant 3, mRNA.                                                   |
| ERBB4    | 2066   | Homo sapiens erb-b2 receptor tyrosine kinase 4 (ERBB4), transcript variant JM-a/CVT-2, mRNA.                         |
| ERCC4    | 2072   | Homo sapiens ERCC excision repair 4, endonuclease catalytic subunit (ERCC4), mRNA.                                   |
| ERCC6L2  | 375748 | Homo sapiens ERCC excision repair 6 like 2 (ERCC6L2), transcript variant 3, mRNA.                                    |
| ESRRB    | 2103   | Homo sapiens estrogen related receptor beta (ESRRB), transcript variant 2, mRNA.                                     |
| ETV3     | 2117   | Homo sapiens ETS variant transcription factor 3 (ETV3), transcript variant 1, mRNA.                                  |
| FAM227A  | 646851 | Homo sapiens family with sequence similarity 227 member A(FAM227A), transcript variant 1, mRNA.                      |
| FAM53C   | 51307  | Homo sapiens family with sequence similarity 53 member C (FAM53C), transcript variant 1, mRNA.                       |
| FAT3     | 120114 | Homo sapiens FAT atypical cadherin 3 (FAT3), transcript variant 2, mRNA.                                             |
| FAXC     | 84553  | Homo sapiens failed axon connections homolog, metaxin like GST domain containing (FAXC), transcript variant 2, mRNA. |
| FBXO27   | 126433 | Homo sapiens F-box protein 27 (FBXO27), mRNA.                                                                        |
| FCHO2    | 115548 | Homo sapiens FCH and mu domain containing endocytic adaptor 2(FCHO2), transcript variant 2, mRNA.                    |
| FCRL5    | 83416  | Homo sapiens Fc receptor like 5 (FCRL5), transcript variant 2, mRNA.                                                 |
| FGF12    | 2257   | Homo sapiens fibroblast growth factor 12 (FGF12), transcript variant 3, mRNA.                                        |
| FGF5     | 2250   | Homo sapiens fibroblast growth factor 5 (FGF5), transcript variant3, mRNA.                                           |
| FHL5     | 9457   | Homo sapiens four and a half LIM domains 5 (FHL5), transcript variant 2, mRNA.                                       |
| FMN1     | 342184 | Homo sapiens formin 1 (FMN1), transcript variant 2, mRNA.                                                            |
| FOXC1    | 2296   | Homo sapiens forkhead box C1 (FOXC1), mRNA.                                                                          |
| FREM1    | 158326 | Homo sapiens FRAS1 related extracellular matrix 1 (FREM1), transcript variant 2, mRNA.                               |
| FRMD7    | 90167  | Homo sapiens FERM domain containing 7 (FRMD7), transcript variant2, mRNA.                                            |
| FUT9     | 10690  | Homo sapiens fucosyltransferase 9 (FUT9), mRNA.                                                                      |
| FYB1     | 2533   | Homo sapiens FYN binding protein 1 (FYB1), transcript variant 3, mRNA.                                               |
| GALNT10  | 55568  | Homo sapiens polypeptide N-acetylgalactosaminyltransferase 10(GALNT10), mRNA.                                        |
| GALNT15  | 117248 | Homo sapiens polypeptide N-acetylgalactosaminyltransferase 15(GALNT15), transcript variant 2, mRNA.                  |
| GANC     | 2595   | Homo sapiens glucosidase alpha, neutral C (GANC), transcript variant 2, mRNA.                                        |
| GAS2L3   | 283431 | Homo sapiens growth arrest specific 2 like 3 (GAS2L3), transcript variant 2, mRNA.                                   |
| GFRA1    | 2674   | Homo sapiens GDNF family receptor alpha 1 (GFRA1), transcript variant 3, mRNA.                                       |
| GLIPR1   | 11010  | Homo sapiens GLI pathogenesis related 1 (GLIPR1), mRNA.                                                              |
| GLIS3    | 169792 | Homo sapiens GLIS family zinc finger 3 (GLIS3), transcript variant1, mRNA.                                           |
| GPR161   | 23432  | Homo sapiens G protein-coupled receptor 161 (GPR161), transcript variant 1, mRNA.                                    |
| GRAMD2A  | 196996 | Homo sapiens GRAM domain containing 2A (GRAMD2A), mRNA.                                                              |
| GRHL1    | 29841  | Homo sapiens grainyhead like transcription factor 1 (GRHL1), mRNA.                                                   |
| GRM5     | 2915   | Homo sapiens glutamate metabotropic receptor 5 (GRM5), transcript variant b, mRNA.                                   |
| GSTCD    | 79807  | Homo sapiens glutathione S-transferase C-terminal domain containing (GSTCD), transcript variant 1, mRNA.             |
| GTF2H3   | 2967   | Homo sapiens general transcription factor IIH subunit 3 (GTF2H3), transcript variant 2, mRNA.                        |
| HGF      | 3082   | Homo sapiens hepatocyte growth factor (HGF), transcript variant 1, mRNA.                                             |
| HIGD2A   | 192286 | Homo sapiens HIG1 hypoxia inducible domain family member 2A(HIGD2A), mRNA; nuclear gene for mitochondrial product.   |
| HNRNPF   | 3185   | Homo sapiens heterogeneous nuclear ribonucleoprotein F (HNRNPF), transcript variant 2, mRNA.                         |
| HTRA3    | 94031  | Homo sapiens HtrA serine peptidase 3 (HTRA3), transcript variant 2, mRNA.                                            |
| HYDIN    | 54768  | Homo sapiens HYDIN axonemal central pair apparatus protein (HYDIN), transcript variant 3, mRNA.                      |
| IFIT1    | 3434   | Homo sapiens interferon induced protein with tetratricopeptide repeats 1 (IFIT1), transcript variant 2, mRNA.        |
| IL5RA    | 3568   | Homo sapiens interleukin 5 receptor subunit alpha (IL5RA), transcript variant 1, mRNA.                               |
| IRAK3    | 11213  | Homo sapiens interleukin 1 receptor associated kinase 3 (IRAK3), transcript variant 2, mRNA.                         |
| KBTBD11  | 9920   | Homo sapiens kelch repeat and BTB domain containing 11 (KBTBD11), mRNA.                                              |
| KCNK2    | 3776   | Homo sapiens potassium two pore domain channel subfamily K member 2(KCNK2), transcript variant 1, mRNA.              |
| KCNMA1   | 3778   | Homo sapiens potassium calcium-activated channel subfamily M alpha1 (KCNMA1), transcript variant 1, mRNA.            |
| KCTD16   | 57528  | Homo sapiens potassium channel tetramerization domain containing 16(KCTD16), transcript variant 1, mRNA.             |
| KDM5A    | 5927   | Homo sapiens lysine demethylase 5A (KDM5A), mRNA.                                                                    |
| KIAA1210 | 57481  | Homo sapiens KIAA1210 (KIAA1210), transcript variant 1, mRNA.                                                        |
| KIAA1522 | 57648  | Homo sapiens KIAA1522 (KIAA1522), transcript variant 2, mRNA.                                                        |

|            |        |                                                                                                                |
|------------|--------|----------------------------------------------------------------------------------------------------------------|
| KIF13B     | 23303  | Homo sapiens kinesin family member 13B (KIF13B), mRNA.                                                         |
| KLC1       | 3831   | Homo sapiens kinesin light chain 1 (KLC1), transcript variant 3, mRNA.                                         |
| KLHL6      | 89857  | Homo sapiens kelch like family member 6 (KLHL6), mRNA.                                                         |
| KLK7       | 5650   | Homo sapiens kallikrein related peptidase 7 (KLK7), transcript variant 3, mRNA.                                |
| KMT2D      | 8085   | Homo sapiens lysine methyltransferase 2D (KMT2D), mRNA.                                                        |
| KPNA6      | 23633  | Homo sapiens karyopherin subunit alpha 6 (KPNA6), mRNA.                                                        |
| KPNB1      | 3837   | Homo sapiens karyopherin subunit beta 1 (KPNB1), transcript variant2, mRNA.                                    |
| L2HGDH     | 79944  | Homo sapiens L-2-hydroxyglutarate dehydrogenase (L2HGDH), mRNA;nuclear gene for mitochondrial product.         |
| LAMA3      | 3909   | Homo sapiens laminin subunit alpha 3 (LAMA3), transcript variant 2, mRNA.                                      |
| LDHA       | 3939   | Homo sapiens lactate dehydrogenase A (LDHA), transcript variant 2, mRNA.                                       |
| LNPK       | 80856  | Homo sapiens lunapark, ER junction formation factor (LNPK), transcript variant 1, mRNA.                        |
| LPP        | 4026   | Homo sapiens LIM domain containing preferred translocation partnerin lipoma (LPP), transcript variant 2, mRNA. |
| LRRC8C     | 84230  | Homo sapiens leucine rich repeat containing 8 VRAC subunit C(LRRC8C), mRNA.                                    |
| LRRTM3     | 347731 | Homo sapiens leucine rich repeat transmembrane neuronal 3 (LRRTM3), transcript variant 1, mRNA.                |
| MAGOH      | 4116   | Homo sapiens mago homolog, exon junction complex subunit (MAGOH), mRNA.                                        |
| MAP3K2     | 10746  | Homo sapiens mitogen-activated protein kinase kinase kinase 2(MAP3K2), transcript variant 2, mRNA.             |
| MAP3K20    | 51776  | Homo sapiens mitogen-activated protein kinase kinase kinase 20(MAP3K20), transcript variant 1, mRNA.           |
| MAP3K7     | 6885   | Homo sapiens mitogen-activated protein kinase kinase kinase 7(MAP3K7), transcript variant A, mRNA.             |
| MAPK6      | 5597   | Homo sapiens mitogen-activated protein kinase 6 (MAPK6), mRNA.                                                 |
| MARCHF6    | 10299  | Homo sapiens membrane associated ring-CH-type finger 6 (MARCHF6), transcript variant 2, mRNA.                  |
| MBNL2      | 10150  | Homo sapiens muscleblind like splicing regulator 2 (MBNL2), transcript variant 4, mRNA.                        |
| MDM1       | 56890  | Homo sapiens Mdm1 nuclear protein (MDM1), transcript variant 4, mRNA.                                          |
| MDM4       | 4194   | Homo sapiens MDM4 regulator of p53 (MDM4), transcript variant 2, mRNA.                                         |
| MMD2       | 221938 | Homo sapiens monocyte to macrophage differentiation associated 2(MMD2), transcript variant 1, mRNA.            |
| MMP16      | 4325   | Homo sapiens matrix metallopeptidase 16 (MMP16), mRNA.                                                         |
| MOB1A      | 55233  | Homo sapiens MOB kinase activator 1A (MOB1A), transcript variant 2, mRNA.                                      |
| MS4A10     | 341116 | Homo sapiens membrane spanning 4-domains A10 (MS4A10), mRNA.                                                   |
| MS4A3      | 932    | Homo sapiens membrane spanning 4-domains A3 (MS4A3), transcript variant 3, mRNA.                               |
| MSI2       | 124540 | Homo sapiens musashi RNA binding protein 2 (MSI2), transcript variant 3, mRNA.                                 |
| MSR1       | 4481   | Homo sapiens macrophage scavenger receptor 1 (MSR1), transcript variant 4, mRNA.                               |
| MSTN       | 2660   | Homo sapiens myostatin (MSTN), mRNA.                                                                           |
| MTHFSD     | 64779  | Homo sapiens methenyltetrahydrofolate synthetase domain containing (MTHFSD), transcript variant 1, mRNA.       |
| MUC21      | 394263 | Homo sapiens mucin 21, cell surface associated (MUC21), transcript variant 1, mRNA.                            |
| NAPEPLD    | 222236 | Homo sapiens N-acyl phosphatidylethanolamine phospholipase D(NAPEPLD), transcript variant 1, mRNA.             |
| NAV1       | 89796  | Homo sapiens neuron navigator 1 (NAV1), transcript variant 2, mRNA.                                            |
| NCOA2      | 10499  | Homo sapiens nuclear receptor coactivator 2 (NCOA2), transcript variant 1, mRNA.                               |
| NDUFA5     | 4698   | Homo sapiens NADH:ubiquinone oxidoreductase subunit A5 (NDUFA5),transcript variant 2, mRNA.                    |
| NEK11      | 79858  | Homo sapiens NIMA related kinase 11 (NEK11), transcript variant 3, mRNA.                                       |
| NIPSNAP2   | 2631   | Homo sapiens nipsnap homolog 2 (NIPSNAP2), transcript variant 2, mRNA.                                         |
| NIPSNAP3B  | 55335  | Homo sapiens nipsnap homolog 3B (NIPSNAP3B), transcript variant 1, mRNA.                                       |
| NKD1       | 85407  | Homo sapiens NKD inhibitor of WNT signaling pathway 1 (NKD1), mRNA.                                            |
| NLGN3      | 54413  | Homo sapiens neuroligin 3 (NLGN3), transcript variant 3, mRNA.                                                 |
| NLK        | 51701  | Homo sapiens nemo like kinase (NLK), mRNA.                                                                     |
| NLRC3      | 197358 | Homo sapiens NLR family CARD domain containing 3 (NLRC3), transcript variant 1, mRNA.                          |
| NOTCH1     | 4851   | Homo sapiens notch receptor 1 (NOTCH1), mRNA.                                                                  |
| NRAS       | 4893   | Homo sapiens NRAS proto-oncogene, GTPase (NRAS), mRNA.                                                         |
| NRP2       | 8828   | Homo sapiens neuropilin 2 (NRP2), transcript variant 2, mRNA.                                                  |
| NRXN1      | 9378   | Homo sapiens neurexin 1 (NRXN1), transcript variant alpha2, mRNA.                                              |
| NUAK1      | 9891   | Homo sapiens NUAK family kinase 1 (NUAK1), mRNA.                                                               |
| NXPE3      | 91775  | Homo sapiens neurexophilin and PC-esterase domain family member 3(NXPE3), transcript variant 1, mRNA.          |
| ODR4       | 54953  | Homo sapiens odr-4 GPCR localization factor homolog (ODR4), transcript variant 2, mRNA.                        |
| OPRM1      | 4988   | Homo sapiens opioid receptor mu 1 (OPRM1), transcript variantMOR-1, mRNA.                                      |
| OSBPL6     | 114880 | Homo sapiens oxysterol binding protein like 6 (OSBPL6), transcript variant 3, mRNA.                            |
| OTUD4      | 54726  | Homo sapiens OTU deubiquitinase 4 (OTUD4), transcript variant 3, mRNA.                                         |
| PALM2AKAP2 | 445815 | Homo sapiens PALM2 and AKAP2 fusion (PALM2AKAP2), transcript variant 5, mRNA.                                  |
| PANK1      | 53354  | Homo sapiens pantothenate kinase 1 (PANK1), transcript variant gamma, mRNA.                                    |
| PARP8      | 79668  | Homo sapiens poly(ADP-ribose) polymerase family member 8 (PARP8),transcript variant 1, mRNA.                   |
| PARP8      | 79668  | Homo sapiens poly(ADP-ribose) polymerase family member 8 (PARP8),transcript variant 1, mRNA.                   |
| PARVA      | 55742  | Homo sapiens parvin alpha (PARVA), mRNA.                                                                       |
| PCMTD2     | 55251  | Homo sapiens protein-L-isoaspartate (D-aspartate) O-methyltransferase domain containing 2 (PCMTD2), transcript |
| PDS5A      | 23244  | Homo sapiens PDS5 cohesin associated factor A (PDS5A), transcript variant 1, mRNA.                             |
| PGM5       | 5239   | Homo sapiens phosphoglucomutase 5 (PGM5), mRNA.                                                                |
| PHF12      | 57649  | Homo sapiens PHD finger protein 12 (PHF12), transcript variant 1, mRNA.                                        |
| PHF19      | 26147  | Homo sapiens PHD finger protein 19 (PHF19), transcript variant 2, mRNA.                                        |
| PIK3AP1    | 118788 | Homo sapiens phosphoinositide-3-kinase adaptor protein 1 (PIK3AP1), mRNA.                                      |
| PITPNA     | 5306   | Homo sapiens phosphatidylinositol transfer protein alpha (PITPNA), mRNA.                                       |

|          |           |                                                                                                                                    |
|----------|-----------|------------------------------------------------------------------------------------------------------------------------------------|
| PLAG1    | 5324      | Homo sapiens PLAG1 zinc finger (PLAG1), transcript variant 2, mRNA.                                                                |
| PLCB1    | 23236     | Homo sapiens phospholipase C beta 1 (PLCB1), transcript variant 1, mRNA.                                                           |
| PLCH1    | 23007     | Homo sapiens phospholipase C eta 1 (PLCH1), transcript variant 1, mRNA.                                                            |
| PLEKHA1  | 59338     | Homo sapiens pleckstrin homology domain containing A1 (PLEKHA1), transcript variant 2, mRNA.                                       |
| PLEKHH1  | 57475     | Homo sapiens pleckstrin homology, MyTH4 and FERM domain containingH1 (PLEKHH1), mRNA.                                              |
| POM121C  | 100101267 | Homo sapiens POM121 transmembrane nucleoporin C (POM121C), transcript variant 1, mRNA.                                             |
| POU2F1   | 5451      | Homo sapiens POU class 2 homeobox 1 (POU2F1), transcript variant 2, mRNA.                                                          |
| PPM1L    | 151742    | Homo sapiens protein phosphatase, Mg2+/Mn2+ dependent 1L (PPM1L), transcript variant 2, mRNA.                                      |
| PPP1R12B | 4660      | Homo sapiens protein phosphatase 1 regulatory subunit 12B(PPP1R12B), transcript variant 5, mRNA.                                   |
| PPTC7    | 160760    | Homo sapiens protein phosphatase targeting COQ7 (PPTC7), transcript variant 1, mRNA.                                               |
| PREX2    | 80243     | Homo sapiens phosphatidylinositol-3,4,5-trisphosphate dependent Rac exchange factor 2 (PREX2), transcript variant 1, mRNA.         |
| PRPS1    | 5631      | Homo sapiens phosphoribosyl pyrophosphate synthetase 1 (PRPS1), transcript variant 2, mRNA.                                        |
| PRRG1    | 5638      | Homo sapiens proline rich and Gla domain 1 (PRRG1), transcript variant 1, mRNA.                                                    |
| PRTFDC1  | 56952     | Homo sapiens phosphoribosyl transferase domain containing 1(PRTFDC1), transcript variant 2, mRNA.                                  |
| PRUNE2   | 158471    | Homo sapiens prune homolog 2 with BCH domain (PRUNE2), transcript variant 2, mRNA.                                                 |
| PTPRA    | 5786      | Homo sapiens protein tyrosine phosphatase receptor type A (PTPRA), transcript variant 4, mRNA.                                     |
| PURB     | 5814      | Homo sapiens purine rich element binding protein B (PURB), mRNA.                                                                   |
| RAP2C    | 57826     | Homo sapiens RAP2C, member of RAS oncogene family (RAP2C), transcript variant 1, mRNA.                                             |
| RASAL2   | 9462      | Homo sapiens RAS protein activator like 2 (RASAL2), transcript variant 1, mRNA.                                                    |
| RBBP4    | 5928      | Homo sapiens RB binding protein 4, chromatin remodeling factor (RBBP4), transcript variant 2, mRNA.                                |
| RIPK2    | 8767      | Homo sapiens receptor interacting serine/threonine kinase 2(RIPK2), transcript variant 2, mRNA.                                    |
| RMI1     | 80010     | Homo sapiens RecQ mediated genome instability 1 (RMI1), transcript variant 1, mRNA.                                                |
| RNF144A  | 9781      | Homo sapiens ring finger protein 144A (RNF144A), transcript variant1, mRNA.                                                        |
| ROBO1    | 6091      | Homo sapiens roundabout guidance receptor 1 (ROBO1), transcript variant 4, mRNA.                                                   |
| RORA     | 6095      | Homo sapiens RAR related orphan receptor A (RORA), transcript variant 3, mRNA.                                                     |
| SDHC     | 6391      | Homo sapiens succinate dehydrogenase complex subunit C (SDHC), transcript variant 2, mRNA; nuclear gene for mitochondrial product. |
| SDK1     | 221935    | Homo sapiens sidekick cell adhesion molecule 1 (SDK1), transcript variant 2, mRNA.                                                 |
| SEC22C   | 9117      | Homo sapiens SEC22 homolog C, vesicle trafficking protein (SEC22C), transcript variant 3, mRNA.                                    |
| SEMA6A   | 57556     | Homo sapiens semaphorin 6A (SEMA6A), transcript variant 1, mRNA.                                                                   |
| SEN1     | 29843     | Homo sapiens SUMO specific peptidase 1 (SEN1), transcript variant1, mRNA.                                                          |
| SERPIND1 | 3053      | Homo sapiens serpin family D member 1 (SERPIND1), mRNA.                                                                            |
| SGCD     | 6444      | Homo sapiens sarcoglycan delta (SGCD), transcript variant 1, mRNA.                                                                 |
| SGIP1    | 84251     | Homo sapiens SH3GL interacting endocytic adaptor 1 (SGIP1), transcript variant 2, mRNA.                                            |
| SH2D1A   | 4068      | Homo sapiens SH2 domain containing 1A (SH2D1A), transcript variant2, mRNA.                                                         |
| SH3TC2   | 79628     | Homo sapiens SH3 domain and tetratricopeptide repeats 2 (SH3TC2), mRNA.                                                            |
| SHANK1   | 50944     | Homo sapiens SH3 and multiple ankyrin repeat domains 1 (SHANK1), mRNA.                                                             |
| SIAH3    | 283514    | Homo sapiens siah E3 ubiquitin protein ligase family member 3(SIAH3), mRNA.                                                        |
| SKA2     | 348235    | Homo sapiens spindle and kinetochore associated complex subunit 2(SKA2), transcript variant 2, mRNA.                               |
| SLAMF6   | 114836    | Homo sapiens SLAM family member 6 (SLAMF6), transcript variant 1, mRNA.                                                            |
| SLC16A7  | 9194      | Homo sapiens solute carrier family 16 member 7 (SLC16A7), transcript variant 2, mRNA.                                              |
| SLC22A23 | 63027     | Homo sapiens solute carrier family 22 member 23 (SLC22A23), transcript variant 3, mRNA.                                            |
| SLC35E3  | 55508     | Homo sapiens solute carrier family 35 member E3 (SLC35E3), transcript variant 2, mRNA.                                             |
| SLC38A10 | 124565    | Homo sapiens solute carrier family 38 member 10 (SLC38A10), transcript variant 1, mRNA.                                            |
| SLC4A8   | 9498      | Homo sapiens solute carrier family 4 member 8 (SLC4A8), transcript variant 1, mRNA.                                                |
| SLTM     | 79811     | Homo sapiens SAFB like transcription modulator (SLTM), transcript variant 2, mRNA.                                                 |
| SMC4     | 10051     | Homo sapiens structural maintenance of chromosomes 4 (SMC4), transcript variant 2, mRNA.                                           |
| SMURF2   | 64750     | Homo sapiens SMAD specific E3 ubiquitin protein ligase 2 (SMURF2), mRNA.                                                           |
| SNRK     | 54861     | Homo sapiens SNF related kinase (SNRK), transcript variant 2, mRNA.                                                                |
| SOD2     | 6648      | Homo sapiens superoxide dismutase 2 (SOD2), transcript variant 1, mRNA; nuclear gene for mitochondrial product.                    |
| SORCS1   | 114815    | Homo sapiens sortilin related VPS10 domain containing receptor 1(SORCS1), transcript variant 2, mRNA.                              |
| SP1      | 6667      | Homo sapiens Sp1 transcription factor (SP1), transcript variant 3, mRNA.                                                           |
| SP2      | 6668      | Homo sapiens Sp2 transcription factor (SP2), mRNA.                                                                                 |
| SPON1    | 10418     | Homo sapiens spondin 1 (SPON1), mRNA.                                                                                              |
| SPTBN1   | 6711      | Homo sapiens spectrin beta, non-erythrocytic 1 (SPTBN1), transcript variant 1, mRNA.                                               |
| SRGAP1   | 57522     | Homo sapiens SLIT-ROBO Rho GTPase activating protein 1 (SRGAP1), transcript variant 2, mRNA.                                       |
| SRGAP2   | 23380     | Homo sapiens SLIT-ROBO Rho GTPase activating protein 2 (SRGAP2), transcript variant 3, mRNA.                                       |
| STK3     | 6788      | Homo sapiens serine/threonine kinase 3 (STK3), transcript variant2, mRNA.                                                          |
| STX17    | 55014     | Homo sapiens syntaxin 17 (STX17), mRNA.                                                                                            |
| STXBP5   | 134957    | Homo sapiens syntaxin binding protein 5 (STXBP5), transcript variant 2, mRNA.                                                      |
| STXBP5L  | 9515      | Homo sapiens syntaxin binding protein 5L (STXBP5L), transcript variant 2, mRNA.                                                    |
| SUMO2    | 6613      | Homo sapiens small ubiquitin like modifier 2 (SUMO2), transcript variant 2, mRNA.                                                  |
| SYN2     | 6854      | Homo sapiens synapsin II (SYN2), transcript variant IIb, mRNA.                                                                     |
| SYNPO2   | 171024    | Homo sapiens synaptopodin 2 (SYNPO2), transcript variant 2, mRNA.                                                                  |
| SYT14    | 255928    | Homo sapiens synaptotagmin 14 (SYT14), transcript variant 1, mRNA.                                                                 |

|          |           |                                                                                                                        |
|----------|-----------|------------------------------------------------------------------------------------------------------------------------|
| SYT4     | 6860      | Homo sapiens synaptotagmin 4 (SYT4), mRNA.                                                                             |
| TAL2     | 6887      | Homo sapiens TAL bHLH transcription factor 2 (TAL2), mRNA.                                                             |
| TAOK1    | 57551     | Homo sapiens TAO kinase 1 (TAOK1), transcript variant 1, mRNA.                                                         |
| TBC1D23  | 55773     | Homo sapiens TBC1 domain family member 23 (TBC1D23), transcript variant 1, mRNA.                                       |
| TBL2     | 26608     | Homo sapiens transducin beta like 2 (TBL2), transcript variant 2, mRNA.                                                |
| TBRG1    | 84897     | Homo sapiens transforming growth factor beta regulator 1 (TBRG1), transcript variant 1, mRNA.                          |
| TCN1     | 6947      | Homo sapiens transcobalamin 1 (TCN1), mRNA.                                                                            |
| TEDDM1   | 127670    | Homo sapiens transmembrane epididymal protein 1 (TEDDM1), mRNA.                                                        |
| THSD7A   | 221981    | Homo sapiens thrombospondin type 1 domain containing 7A (THSD7A), mRNA.                                                |
| TIAM2    | 26230     | Homo sapiens TIAM Rac1 associated GEF 2 (TIAM2), transcript variant2, mRNA.                                            |
| TJP1     | 7082      | Homo sapiens tight junction protein 1 (TJP1), transcript variant 3, mRNA.                                              |
| TLL2     | 7093      | Homo sapiens tolloid like 2 (TLL2), mRNA.                                                                              |
| TMCC1    | 23023     | Homo sapiens transmembrane and coiled-coil domain family 1 (TMCC1), transcript variant 1, mRNA.                        |
| TMEM106B | 54664     | Homo sapiens transmembrane protein 106B (TMEM106B), transcript variant 2, mRNA.                                        |
| TMEM132D | 121256    | Homo sapiens transmembrane protein 132D (TMEM132D), mRNA.                                                              |
| TMEM135  | 65084     | Homo sapiens transmembrane protein 135 (TMEM135), transcript variant 2, mRNA.                                          |
| TMEM184A | 202915    | Homo sapiens transmembrane protein 184A (TMEM184A), mRNA.                                                              |
| TMEM225  | 338661    | Homo sapiens transmembrane protein 225 (TMEM225), transcript variant 1, mRNA.                                          |
| TMEM33   | 55161     | Homo sapiens transmembrane protein 33 (TMEM33), mRNA.                                                                  |
| TMEM69   | 51249     | Homo sapiens transmembrane protein 69 (TMEM69), mRNA.                                                                  |
| TNIK     | 23043     | Homo sapiens TRAF2 and NCK interacting kinase (TNIK), transcript variant 2, mRNA.                                      |
| TNIP1    | 10318     | Homo sapiens TNFAIP3 interacting protein 1 (TNIP1), transcript variant 1, mRNA.                                        |
| TRDMT1   | 1787      | Homo sapiens tRNA aspartic acid methyltransferase 1 (TRDMT1), transcript variant f, mRNA.                              |
| TRDN     | 10345     | Homo sapiens triadin (TRDN), transcript variant 2, mRNA.                                                               |
| TRIM9    | 114088    | Homo sapiens tripartite motif containing 9 (TRIM9), transcript variant 3, mRNA.                                        |
| TRIML2   | 205860    | Homo sapiens tripartite motif family like 2 (TRIML2), transcript variant 1, mRNA.                                      |
| TRIP12   | 9320      | Homo sapiens thyroid hormone receptor interactor 12 (TRIP12), transcript variant 1, mRNA.                              |
| TSC22D1  | 8848      | Homo sapiens TSC22 domain family member 1 (TSC22D1), transcript variant 3, mRNA.                                       |
| TSHZ1    | 10194     | Homo sapiens teashirt zinc finger homeobox 1 (TSHZ1), transcript variant 1, mRNA.                                      |
| TSTD2    | 158427    | Homo sapiens thiosulfate sulfurtransferase like domain containing 2(TSTD2), mRNA.                                      |
| TTC28    | 23331     | Homo sapiens tetratricopeptide repeat domain 28 (TTC28), transcript variant 1, mRNA.                                   |
| TTC29    | 83894     | Homo sapiens tetratricopeptide repeat domain 29 (TTC29), transcript variant 1, mRNA.                                   |
| TUBGCP3  | 10426     | Homo sapiens tubulin gamma complex associated protein 3 (TUBGCP3), transcript variant 2, mRNA.                         |
| UHRF2    | 115426    | Homo sapiens ubiquitin like with PHD and ring finger domains 2(UHRF2), transcript variant 1, mRNA.                     |
| UNC79    | 57578     | Homo sapiens unc-79 homolog, NALCN channel complex subunit (UNC79), transcript variant 1, mRNA.                        |
| UNC80    | 285175    | Homo sapiens unc-80 homolog, NALCN channel complex subunit (UNC80), transcript variant 3, mRNA.                        |
| UQCRC1   | 7384      | Homo sapiens ubiquinol-cytochrome c reductase core protein 1(UQCRC1), mRNA; nuclear gene for mitochondrial product.    |
| USP13    | 8975      | Homo sapiens ubiquitin specific peptidase 13 (USP13), mRNA.                                                            |
| USP15    | 9958      | Homo sapiens ubiquitin specific peptidase 15 (USP15), transcript variant 1, mRNA.                                      |
| USP38    | 84640     | Homo sapiens ubiquitin specific peptidase 38 (USP38), transcript variant 2, mRNA.                                      |
| USP49    | 25862     | Homo sapiens ubiquitin specific peptidase 49 (USP49), transcript variant 1, mRNA.                                      |
| UTY      | 7404      | Homo sapiens ubiquitously transcribed tetratricopeptide repeat containing, Y-linked (UTY), transcript variant 4, mRNA. |
| VEGFD    | 2277      | Homo sapiens vascular endothelial growth factor D (VEGFD), mRNA.                                                       |
| VPS36    | 51028     | Homo sapiens vacuolar protein sorting 36 homolog (VPS36), transcript variant 2, mRNA.                                  |
| VPS45    | 11311     | Homo sapiens vacuolar protein sorting 45 homolog (VPS45), transcript variant 2, mRNA.                                  |
| VPS50    | 55610     | Homo sapiens VPS50 subunit of EARP/GARPII complex (VPS50), transcript variant 3, mRNA.                                 |
| WDR77    | 79084     | Homo sapiens WD repeat domain 77 (WDR77), transcript variant 1, mRNA.                                                  |
| XDH      | 7498      | Homo sapiens xanthine dehydrogenase (XDH), mRNA.                                                                       |
| XIRP2    | 129446    | Homo sapiens xin actin binding repeat containing 2 (XIRP2), transcript variant 2, mRNA.                                |
| ZDHHC5   | 25921     | Homo sapiens zinc finger DHHC-type palmitoyltransferase 5 (ZDHHC5), mRNA.                                              |
| ZFH3     | 463       | Homo sapiens zinc finger homeobox 3 (ZFH3), transcript variant B, mRNA.                                                |
| ZFP36L2  | 678       | Homo sapiens ZFP36 ring finger protein like 2 (ZFP36L2), mRNA.                                                         |
| ZFP69B   | 65243     | Homo sapiens ZFP69 zinc finger protein B (ZFP69B), transcript variant 2, mRNA.                                         |
| ZKSCAN1  | 7586      | Homo sapiens zinc finger with KRAB and SCAN domains 1 (ZKSCAN1), transcript variant 2, mRNA.                           |
| ZNF24    | 7572      | Homo sapiens zinc finger protein 24 (ZNF24), transcript variant 2, mRNA.                                               |
| ZNF292   | 23036     | Homo sapiens zinc finger protein 292 (ZNF292), transcript variant2, mRNA.                                              |
| ZNF569   | 148266    | Homo sapiens zinc finger protein 569 (ZNF569), transcript variant2, mRNA.                                              |
| ZNF652   | 22834     | Homo sapiens zinc finger protein 652 (ZNF652), transcript variant1, mRNA.                                              |
| ZNF704   | 619279    | Homo sapiens zinc finger protein 704 (ZNF704), transcript variant1, mRNA.                                              |
| ZNF737   | 100129842 | Homo sapiens zinc finger protein 737 (ZNF737), mRNA.                                                                   |
| ZNF764   | 92595     | Homo sapiens zinc finger protein 764 (ZNF764), transcript variant2, mRNA.                                              |

**Supplementary Table S2.** GO and KEGG functional analysis of miR-1290 target genes.

| GO cellular component                       | Count | P-Value  | Genes                                                                                                                                                                                                                                                                                                                                                                                                                                                                                                                                                                                                                                                                                                                                                                                                                                                        |
|---------------------------------------------|-------|----------|--------------------------------------------------------------------------------------------------------------------------------------------------------------------------------------------------------------------------------------------------------------------------------------------------------------------------------------------------------------------------------------------------------------------------------------------------------------------------------------------------------------------------------------------------------------------------------------------------------------------------------------------------------------------------------------------------------------------------------------------------------------------------------------------------------------------------------------------------------------|
| nucleoplasm                                 | 88    | 0.000047 | KDM5A, ATF1, BNC2, ARID4B, RORA, SMC4, EME1, MAGOH, SUMO2, ENSA, KPNA6, BBX, SLC16A7, UTY, NCOA2, USP49, MBNL2, RMI1, DYRK1A, ETV3, CBFA2T3, SENP1, WDR77, FRMD7, SLTM, TNIK, PPP1R12B, DTL, KPNB1, USP13, KMT2D, FOXC1, CTDP1, NOTCH1, UHRF2, PLAG1, SYNPO2, CUL2, CAMK2A, ANKRD12, ARHGAP17, ZNF24, C1ORF52, PDS5A, NLK, TBRG1, PURB, NUA1, CHTF8, ATXN1, RBBP4, DHX33, ERBB4, SRGAP2, MAPK6, LNP, TRDMT1, ATF7IP, MAP3K2, ZFH3, POU2F1, PLEKHA1, SMURF2, ERCC6L2, SIAH3, PHF12, ESRRB, CDC5L, ATP2B1, GRHL1, GTF2H3, A1CF, CUL4A, MOB1A, SP2, TRIML2, TNIP1, SP1, ERCC4, AGO1, CAMK4, HNRNPF, NAPEPLD, MDM4, TRIP12, BRWD1, PHF19, NEK11                                                                                                                                                                                                                  |
| cytoplasm                                   | 114   | 0.000049 | PANK1, FBXO27, PITPNA, MSI2, ADARB2, IFIT1, FGF5, AKR7A2, MAGOH, CAPN2, KPNA6, GAS2L3, MBNL2, DYRK1A, ACSL4, WDR77, CLIP3, TNIK, KPNB1, CSNK1G1, GSTCD, ARHGAP17, NLK, KLC1, ZFP36L2, SKA2, STK3, LDHA, NUA1, ATXN1, DHX33, MAP3K20, STXBP5, SRGAP2, CCDC141, SRGAP1, SPTBN1, ZFH3, SMURF2, SIAH3, ESRRB, SH2D1A, DNAJC12, PARVA, A1CF, MOB1A, DLG1, CNOT7, SP1, AGO1, NAPEPLD, TUBGCP3, PLCH1, CPEB2, FGF12, MDM1, MSTN, FMN1, ARHGAP5, TTC29, BICD2, TTC28, ROBO1, PCMTD2, TRIM9, GRM5, SGCD, ENSA, KIF13B, HYDIN, NCOA2, USP49, TSC22D1, SGIP1, RIPK2, NAV1, IRAK3, CTTNBP2NL, SENP1, RNF144A, RAP2C, DCX, PPP1R12B, PLCB1, SHANK1, SEC22C, PRPS1, USP15, CTDP1, STX17, FAXC, PRUNE2, CAMK2A, NLRC3, NKD1, EGFR, MTHFSD, ABLIM1, FCHO2, LRRC8C, MAPK6, DYNC111, TRDMT1, MAP3K2, PLEKHA1, ERCC6L2, CDC5L, STXBP5L, TJP1, SNRK, TRIML2, CAMK4, TAOK1, NEK11 |
| nucleus                                     | 112   | 0.003763 | OTUD4, ATF1, PANK1, ZNF292, PITPNA, ARID4B, RORA, SMC4, EME1, MAGOH, CAPN2, KPNA6, FAM53C, ZNF569, BBX, VPS36, MAP3K7, DYRK1A, EBF1, ZFP69B, WDR77, CLIP3, ANKRD42, TNIK, KPNB1, CSNK1G1, KMT2D, NOTCH1, TSHZ1, GLIS3, ZNF24, PDS5A, NLK, LPP, ZFP36L2, STK3, LDHA, NUA1, ATXN1, DHX33, ZNF704, MAP3K20, SPTBN1, ZKSCAN1, ZFH3, POU2F1, FYB1, SMURF2, PHF12, ESRRB, PARVA, A1CF, MOB1A, DLG1, CNOT7, SP1, HNRNPF, AGO1, MDM4, BRWD1, CPEB2, FGF12, ZNF652, PHF19, MDM1, KDM5A, USP38, BNC2, FMN1, FHL5, SUMO2, ZNF764, NCOA2, TSC22D1, CTDSPL, IRAK3, ETV3, CBFA2T3, CDYL2, SENP1, SLTM, ELF5, PLCB1, DTL, CREB5, USP13, USP15, FOXC1, CTDP1, UHRF2, SYNPO2, CAMK2A, EGFR, TBRG1, PURB, RBBP4, ERBB4, MAPK6, DYNC111, ATF7IP, ERCC6L2, CDC5L, GRHL1, GTF2H3, SNRK, ERCC4, CAMK4, ASXL3, ZNF737, TRIP12, KCNK2, NEK11                                         |
| glutamatergic synapse                       | 14    | 0.004287 | SYT4, NRP2, ATP2B1, SYN2, SLC4A8, GRM5, DLG1, LRRTM3, ERBB4, CAMK4, TNIK, PLCB1, SPTBN1, SHANK1                                                                                                                                                                                                                                                                                                                                                                                                                                                                                                                                                                                                                                                                                                                                                              |
| cytosol                                     | 104   | 0.005000 | OTUD4, PANK1, FBXO27, PITPNA, ARID4B, MSI2, IFIT1, SMC4, PREX2, AKR7A2, CAPN2, KPNA6, BBX, VPS36, MAP3K7, ANK2, WDR77, TIAM2, CLIP3, CACNB4, FRMD7, TNIK, TBC1D23, KPNB1, CSNK1G1, NOTCH1, CUL2, ANKRD12, ARHGAP17, RASAL2, PDS5A, NLK, KLC1, LPP, SKA2, STK3, LDHA, ATXN1, MAP3K20, STXBP5, SRGAP2, SRGAP1, SPTBN1, MSR1, OSBP1, FYB1, SMURF2, ESRRB, SH2D1A, PARVA, MOB1A, DLG1, CNOT7, HNRNPF, AGO1, TUBGCP3, PLCH1, TMCC1, BRWD1, MDM1, USP38, ARHGAP5, BICD2, KIF13B, BBS9, PGM5, SGIP1, RIPK2, DCC, TRDN, RAP2C, DCX, COL21A1, PPP1R12B, PLCB1, DTL, SHANK1, USP13, PRPS1, USP15, FOXC1, STX17, PLAG1, SYNPO2, CAMK2A, NLRC3, NRAS, RBBP4, ERBB4, VPS50, CHN2, FCHO2, MAPK6, XDH, DYNC111, ATF7IP, MAP3K2, PLEKHA1, TJP1, TRIML2, TNIP1, TAOK1, TRIP12, PIK3AP1                                                                                        |
| Schaffer collateral - CA1 synapse           | 6     | 0.008747 | GRM5, PTPRA, DCC, STXBP5, SYN2, SHANK1                                                                                                                                                                                                                                                                                                                                                                                                                                                                                                                                                                                                                                                                                                                                                                                                                       |
| Z disc                                      | 7     | 0.015211 | SYNPO2, XIRP2, PGM5, PARVA, ANK2, FHL5, PPP1R12B                                                                                                                                                                                                                                                                                                                                                                                                                                                                                                                                                                                                                                                                                                                                                                                                             |
| recycling endosome                          | 7     | 0.015739 | SH3TC2, PANK1, VPS50, GPR161, ANK2, TNIK, DYNC111                                                                                                                                                                                                                                                                                                                                                                                                                                                                                                                                                                                                                                                                                                                                                                                                            |
| axon                                        | 12    | 0.018175 | UNC80, SYT4, NRP2, SEMA6A, CALCR, CNTN6, DCC, DYRK1A, KIF13B, GFRA1, OPRM1, ROBO1                                                                                                                                                                                                                                                                                                                                                                                                                                                                                                                                                                                                                                                                                                                                                                            |
| astrocyte projection                        | 3     | 0.018634 | SYT4, GRM5, KCNK2                                                                                                                                                                                                                                                                                                                                                                                                                                                                                                                                                                                                                                                                                                                                                                                                                                            |
| stress fiber                                | 5     | 0.023077 | ABLIM1, SYNPO2, XIRP2, PGM5, LPP                                                                                                                                                                                                                                                                                                                                                                                                                                                                                                                                                                                                                                                                                                                                                                                                                             |
| membrane raft                               | 9     | 0.038186 | CLIP3, CD4, DLG1, SMURF2, CAPN2, ANK2, ATP2B1, OPRM1, EGFR                                                                                                                                                                                                                                                                                                                                                                                                                                                                                                                                                                                                                                                                                                                                                                                                   |
| cytoskeleton                                | 15    | 0.038506 | GAS2L3, SGIP1, RIPK2, DYRK1A, ANK2, TTC29, TRIM9, SGCD, FRMD7, FCHO2, KIF13B, DCX, TNIK, PPP1R12B, PLEKHH1                                                                                                                                                                                                                                                                                                                                                                                                                                                                                                                                                                                                                                                                                                                                                   |
| SNARE complex                               | 4     | 0.040518 | STX17, STXBP5, SYN2, STXBP5L                                                                                                                                                                                                                                                                                                                                                                                                                                                                                                                                                                                                                                                                                                                                                                                                                                 |
| integral component of postsynaptic membrane | 4     | 0.042581 | NLGN3, GRM5, NRP2, OPRM1                                                                                                                                                                                                                                                                                                                                                                                                                                                                                                                                                                                                                                                                                                                                                                                                                                     |
| receptor complex                            | 8     | 0.047925 | NOTCH1, FCRL5, ERBB4, PTPRA, IL5RA, GFRA1, EGFR, KCTD16                                                                                                                                                                                                                                                                                                                                                                                                                                                                                                                                                                                                                                                                                                                                                                                                      |

|                                            |    |          |                                                                                                                                                                                                                                                                                                                                                                                                                                                                                                                                                                                                                                                                   |
|--------------------------------------------|----|----------|-------------------------------------------------------------------------------------------------------------------------------------------------------------------------------------------------------------------------------------------------------------------------------------------------------------------------------------------------------------------------------------------------------------------------------------------------------------------------------------------------------------------------------------------------------------------------------------------------------------------------------------------------------------------|
| neuron projection                          | 11 | 0.048318 | SLC4A8, GRM5, DLG1, FRMD7, CAMK2A, DCX, ANK2, OPRM1, CCDC141, CPEB2, SHANK1                                                                                                                                                                                                                                                                                                                                                                                                                                                                                                                                                                                       |
| host cell                                  | 4  | 0.051347 | POM121C, KPNA6, IFIT1, KPNB1                                                                                                                                                                                                                                                                                                                                                                                                                                                                                                                                                                                                                                      |
| cytoplasmic side of plasma membrane        | 4  | 0.053665 | DLG1, CACNB4, PGM5, ATP2B1                                                                                                                                                                                                                                                                                                                                                                                                                                                                                                                                                                                                                                        |
| basolateral plasma membrane                | 8  | 0.066382 | TJP1, ABCC4, DLG1, ATP7B, ERBB4, ANK2, ATP2B1, EGFR                                                                                                                                                                                                                                                                                                                                                                                                                                                                                                                                                                                                               |
| integral component of presynaptic membrane | 4  | 0.068592 | ERBB4, NRXN1, ATP2B1, OPRM1                                                                                                                                                                                                                                                                                                                                                                                                                                                                                                                                                                                                                                       |
| plasma membrane                            | 88 | 0.072514 | NRP2, MS4A3, ZDHHC5, IL5RA, FMN1, ARHGAP5, ANTXR2, BICD2, ROBO1, PREX2, UNC80, GLIPR1, GRM5, ATP7B, SGCD, CAPN2, SLC16A7, THSD7A, MAP3K7, MS4A10, ABCC4, SGIP1, DCC, ACSL4, ANK2, IRAK3, GFRA1, OPRM1, SYN2, TRDN, CLIP3, RNF144A, RAP2C, CACNB4, FRMD7, MMP16, KCNMA1, SHANK1, CSNK1G1, COLEC12, NLGN3, USP15, NOTCH1, STX17, NRXN1, ARHGAP17, PDS5A, LPP, NKD1, EGFR, PALM2AKAP2, NRAS, CALCR, SH3TC2, ERBB4, PRRG1, FCHO2, LRRC8C, SLAMF6, STXBP5, SRGAP2, CCDC141, SPTBN1, TMEM184A, MSR1, CD164, SYT4, OSBPL6, FYB1, PLEKHA1, SMURF2, CNTN6, PARVA, ATP2B1, STXBP5L, TJP1, SLC4A8, SDK1, CD4, DLG1, PTPRA, HNRNPF, FAT3, PLCH1, PIK3AP1, KCNK2, MUC21, UNC79 |
| sarcolemma                                 | 5  | 0.072522 | DLG1, SGCD, PGM5, ANK2, OPRM1                                                                                                                                                                                                                                                                                                                                                                                                                                                                                                                                                                                                                                     |
| nuclear membrane                           | 8  | 0.073179 | OSBPL6, POM121C, NRXN1, PLCB1, DTL, EGFR, KPNB1, SENP1                                                                                                                                                                                                                                                                                                                                                                                                                                                                                                                                                                                                            |
| membrane                                   | 48 | 0.077724 | NRP2, STX17, LAMA3, ZDHHC5, IL5RA, KLC1, EGFR, PALM2AKAP2, GLIPR1, NRAS, LDHA, ATP7B, CHST11, VPS50, CHN2, LRRC8C, KPNA6, BBS9, MARCHF6, MSR1, SYT4, ABCC4, OSBPL6, PLEKHA1, HGF, ELMOD2, CDC5L, ACSL4, ANK2, AP3B1, VEGFD, SORCS1, ATP2B1, RAP2C, TIAM2, SLC4A8, DLG1, CD4, CNOT7, SLTM, CCPG1, PTPRA, HNRNPF, TMEM106B, TUBGCP3, PIK3AP1, KPNB1, SHANK1                                                                                                                                                                                                                                                                                                         |
| endocytic vesicle membrane                 | 4  | 0.094052 | COLEC12, MSR1, GPR161, CAMK2A                                                                                                                                                                                                                                                                                                                                                                                                                                                                                                                                                                                                                                     |
| postsynaptic membrane                      | 6  | 0.094231 | ERBB4, KCNMA1, ANK2, SRGAP2, SHANK1, KCTD16                                                                                                                                                                                                                                                                                                                                                                                                                                                                                                                                                                                                                       |

| GO molecular function                             | Count | P-Value  | Genes                                                                                                                                                                                                                                                                                                                                                                                                                                                                                                                                                                                                                                                                                                                                                                                                                                                                                                                                                                                                                                                                                                                                                                                                                                                                                                                                                                                                                                                                                                                                                                                                                                                                                                                  |
|---------------------------------------------------|-------|----------|------------------------------------------------------------------------------------------------------------------------------------------------------------------------------------------------------------------------------------------------------------------------------------------------------------------------------------------------------------------------------------------------------------------------------------------------------------------------------------------------------------------------------------------------------------------------------------------------------------------------------------------------------------------------------------------------------------------------------------------------------------------------------------------------------------------------------------------------------------------------------------------------------------------------------------------------------------------------------------------------------------------------------------------------------------------------------------------------------------------------------------------------------------------------------------------------------------------------------------------------------------------------------------------------------------------------------------------------------------------------------------------------------------------------------------------------------------------------------------------------------------------------------------------------------------------------------------------------------------------------------------------------------------------------------------------------------------------------|
| protein binding                                   | 227   | 0.000016 | ATF1, SPON1, PITPNA, ZDHHC5, ANTXR2, IFIT1, SMC4, MAGOH, FAM53C, THSD7A, VPS36, TSTD2, EBF1, ANK2, WDR77, GPR161, UQCRC1, FREM1, KCTD16, ZNF24, NLK, SKA2, NUA1, LDHA, DHX33, POM121C, ZNF704, SLAMF6, SPTBN1, MSR1, FYB1, SIAH3, SLC35E3, SH2D1A, PARVA, A1CF, TCN1, HNRNPF, AGO1, TMCC1, NRP2, MSTN, ARHGAP5, ROBO1, PCMTD2, TRIM9, GLIPR1, ENSA, KIF13B, BBS9, NXPE3, NCOA2, GRAMD2A, TSC22D1, FCRL5, RIPK2, RMI1, SORCS1, AP3B1, CBFA2T3, CDYL2, CTTNBP2NL, SLC22A23, RNF144A, RAP2C, TAL2, SLTM, TMEM33, KCNMA1, TMEM106B, PLCB1, FOXC1, CTDP1, STX17, SYNPO2, NKD1, EGFR, TMEM69, PURB, NRAS, CHN2, XDH, MARCHF6, DYNCH1, MAP3K2, PLEKHA1, ERCC6L2, VEGFD, GRHL1, GTF2H3, STXBP5L, TJP1, TRIML2, KLHL6, TAOK1, TRIP12, NEK11, OTUD4, GALNT15, FBXO27, IL5RA, ARID4B, RORA, MSI2, AKR7A2, EME1, KPNA6, CAPN2, ZNF569, SLC16A7, MAP3K7, GAS2L3, SEMA6A, PPTC7, HGF, ZFP69B, DYRK1A, SDHC, CLIP3, CACNB4, FRMD7, TNIK, TBC1D23, KPNB1, CSNK1G1, KMT2D, NOTCH1, HTRA3, GSTCD, CUL2, GLIS3, ARHGAP17, RASAL2, PDS5A, KLC1, LPP, ZFP36L2, STK3, PALM2AKAP2, ATXN1, CALCR, FUT9, MAP3K20, SRGAP2, CCDC141, SRGAP1, ZKSCAN1, TMEM132D, CD164, SYT4, ZFHX3, OSBPL6, POU2F1, SMURF2, PHF12, DNAJC12, CYP4F11, MOB1A, DLG1, CNOT7, SP2, SP1, CCPG1, PTPRA, MDM4, TUBGCP3, FGF12, ZNF652, PHF19, MDM1, KDM5A, USP38, MS4A3, BNC2, CXORF66, FHL5, BICD2, GRM5, ATP7B, SUMO2, ZNF764, ABCC4, USP49, DCC, SGIP1, CTDSPL, IRAK3, OPRM1, NIPSNAP2, TRDN, SENP1, ELF5, DCX, PPP1R12B, DTL, PRTFDC1, SHANK1, CREB5, SEC22C, NLGN3, USP13, PRPS1, USP15, UHRF2, NRXN1, CAMK2A, NLRC3, TBRG1, ABLIM1, RBBP4, ERBB4, VPS50, PRRG1, FCHO2, LRRC8C, MAPK6, ATF7IP, NDUFA5, CDC5L, ATP2B1, SOD2, CUL4A, CD4, TNIP1, ERCC4, VPS45, PIK3AP1 |
| protein kinase activity                           | 17    | 0.000263 | MAP3K2, RIPK2, DYRK1A, MMD2, NLK, EGFR, STK3, NUA1, SNRK, SLTM, CAMK4, TAOK1, MAP3K20, TNIK, MAP3K7, NEK11, CSNK1G1                                                                                                                                                                                                                                                                                                                                                                                                                                                                                                                                                                                                                                                                                                                                                                                                                                                                                                                                                                                                                                                                                                                                                                                                                                                                                                                                                                                                                                                                                                                                                                                                    |
| protein serine/threonine/tyrosine kinase activity | 18    | 0.000404 | MAP3K2, RIPK2, CAMK2A, DYRK1A, NLK, EGFR, STK3, NUA1, SNRK, ERBB4, CAMK4, TAOK1, MAP3K20, TNIK, MAPK6, MAP3K7, NEK11, CSNK1G1                                                                                                                                                                                                                                                                                                                                                                                                                                                                                                                                                                                                                                                                                                                                                                                                                                                                                                                                                                                                                                                                                                                                                                                                                                                                                                                                                                                                                                                                                                                                                                                          |
| metal ion binding                                 | 62    | 0.000680 | SPON1, NRP2, BNC2, GALNT15, ZNF292, FHL5, ANTXR2, ADARB2, GALNT10, ATP7B, EME1, ZNF569, UTY, ZNF764, MBNL2, PPTC7, EBF1, ZFP69B, CTDSPL, SDHC, CBFA2T3, RNF144A, KCNMA1, UQCRC1, FREM1, CREB5, COLEC12, KMT2D, PPM1L, UHRF2, PLAG1, NRXN1, TSHZ1, PRUNE2, CAMK2A, GLIS3, ZNF24, LPP, ZFP36L2, ABLIM1, NUA1, ZNF704, CHN2, XIRP2, ZKSCAN1, LNP6, MAP3K2, SIAH3, PHF12, ATP2B1,                                                                                                                                                                                                                                                                                                                                                                                                                                                                                                                                                                                                                                                                                                                                                                                                                                                                                                                                                                                                                                                                                                                                                                                                                                                                                                                                          |

|                                                                                |    |          |                                                                                                                                                                                                                                                                                                |
|--------------------------------------------------------------------------------|----|----------|------------------------------------------------------------------------------------------------------------------------------------------------------------------------------------------------------------------------------------------------------------------------------------------------|
|                                                                                |    |          | GTF2H3, SOD2, MOB1A, CNOT7, SP2, SP1, ASXL3, ZNF737, MDM4, ZNF652, PHF19, NEK11                                                                                                                                                                                                                |
| protein serine/threonine kinase activity                                       | 16 | 0.001209 | MAP3K2, RIPK2, CAMK2A, DYRK1A, IRAK3, NLK, STK3, NUA1, SNRK, TAOK1, MAP3K20, TNK1, MAPK6, MAP3K7, NEK11, CSNK1G1                                                                                                                                                                               |
| identical protein binding                                                      | 42 | 0.002943 | ATF1, PRPS1, USP15, NRP2, NOTCH1, MSTN, HTRA3, CAMK2A, MSI2, ZNF24, EGFR, STK3, ROBO1, GRM5, LDHA, ATXN1, FCHO2, SRGAP2, MAP3K7, LNP, POU2F1, SMURF2, RIPK2, HGF, DYRK1A, CDC5L, VEGF, SOD2, SYN2, SDK1, CD4, TNIP1, TRIML2, SP1, ERCC4, KCNMA1, NAPEPLD, TMCC1, PLCB1, PIK3AP1, SHANK1, CREB5 |
| GTPase activator activity                                                      | 12 | 0.004968 | PREX2, TIAM2, ELMOD2, CHN2, ARHGAP17, STXBP5, RASAL2, PLCB1, SRGAP2, ARHGAP5, SRGAP1, STXBP5L                                                                                                                                                                                                  |
| MAP kinase kinase kinase activity                                              | 4  | 0.005810 | MAP3K2, MAP3K20, MAP3K7, EGFR                                                                                                                                                                                                                                                                  |
| protein binding, bridging                                                      | 6  | 0.021845 | CUL4A, SYNPO2, CUL2, ANK2, DTL, TRDN                                                                                                                                                                                                                                                           |
| MAP kinase activity                                                            | 3  | 0.021876 | NLK, MAPK6, MAP3K7                                                                                                                                                                                                                                                                             |
| protein kinase binding                                                         | 15 | 0.023415 | MAP3K2, STX17, ERCC6L2, CDC5L, IRAK3, ANK2, EGFR, DLG1, CD4, TBL2, TRIML2, KIF13B, DCX, PPP1R12B, MAPK6                                                                                                                                                                                        |
| magnesium ion binding                                                          | 9  | 0.026419 | PRPS1, SNRK, MAP3K20, PGM5, IRAK3, NLK, MAP3K7, PRFTDC1, STK3                                                                                                                                                                                                                                  |
| transcription regulatory region sequence-specific DNA binding                  | 9  | 0.030746 | KDM5A, KMT2D, FOXC1, ZFH3, BNC2, ERBB4, SP1, ARID4B, GRHL1                                                                                                                                                                                                                                     |
| cytoskeletal adaptor activity                                                  | 3  | 0.034217 | GAS2L3, ANK2, BICD2                                                                                                                                                                                                                                                                            |
| single-stranded RNA binding                                                    | 4  | 0.042006 | HNRNPF, AGO1, ADARB2, A1CF                                                                                                                                                                                                                                                                     |
| protein C-terminus binding                                                     | 8  | 0.042342 | TJP1, DLG1, ATXN1, ERCC4, SP1, OPRM1, VPS36, SHANK1                                                                                                                                                                                                                                            |
| receptor binding                                                               | 12 | 0.047761 | BMP3, CD4, Fyb1, MSTN, RIPK2, NRXN1, HGF, LAMA3, ENSA, GFRA1, PIK3AP1, TRDN                                                                                                                                                                                                                    |
| microtubule binding                                                            | 9  | 0.053361 | CLIP3, GAS2L3, SGIP1, KIF13B, DCX, FMN1, DYNCH1, MDM1, SKA2                                                                                                                                                                                                                                    |
| RNA polymerase II regulatory region sequence-specific DNA binding              | 11 | 0.058655 | ATF1, PURB, FOXC1, SP1, GLIS3, ZFP69B, BBX, CDC5L, RORA, ZNF764, ETV3                                                                                                                                                                                                                          |
| RNA polymerase II transcription factor activity, sequence-specific DNA binding | 28 | 0.058730 | ATF1, FOXC1, PLAG1, TSHZ1, ZNF292, GLIS3, RORA, ZNF24, PURB, BBX, ZNF569, ZNF764, ZKSCAN1, ZFH3, POU2F1, ESRRB, EBF1, ZFP69B, CDC5L, ETV3, GRHL1, SP2, TAL2, SP1, ZNF737, ELF5, ZNF652, CREB5                                                                                                  |
| nuclear localization sequence binding                                          | 3  | 0.064829 | POM121C, KPNA6, KPNB1                                                                                                                                                                                                                                                                          |
| sequence-specific DNA binding                                                  | 10 | 0.070271 | ATF1, FOXC1, POU2F1, SLTM, SP1, ELF5, ESRRB, RORA, GRHL1, ZNF24                                                                                                                                                                                                                                |
| transmembrane signaling receptor activity                                      | 7  | 0.072245 | CD4, NOTCH1, FCRL5, DCC, NRXN1, ANTXR2, EGFR                                                                                                                                                                                                                                                   |
| enzyme binding                                                                 | 11 | 0.072768 | CD4, ZFH3, NOTCH1, CAPN2, MDM4, ANK2, PLCB1, SOD2, EGFR, MARCHF6, KPNB1                                                                                                                                                                                                                        |
| ATP binding                                                                    | 32 | 0.078070 | PRPS1, PANK1, CAMK2A, NLRC3, NLK, SMC4, EGFR, STK3, NUA1, ATP7B, DHX33, ERBB4, MAP3K20, KIF13B, MAPK6, MAP3K7, MAP3K2, ABCC4, ERCC6L2, RIPK2, DYRK1A, ACSL4, IRAK3, ATP2B1, SYN2, SNRK, SLTM, TAOK1, CAMK4, TNK1, NEK11, CSNK1G1                                                               |
| SNARE binding                                                                  | 4  | 0.082195 | TRIM9, SYT4, STX17, VPS50                                                                                                                                                                                                                                                                      |
| rDNA binding                                                                   | 2  | 0.089205 | DHX33, BNC2                                                                                                                                                                                                                                                                                    |
| ubiquitin-protein transferase activity                                         | 8  | 0.091850 | CUL4A, RNF144A, UHRF2, SMURF2, CUL2, TRIP12, DTL, MARCHF6                                                                                                                                                                                                                                      |
| ubiquitin conjugating enzyme binding                                           | 3  | 0.091887 | RNF144A, SIAH3, MARCHF6                                                                                                                                                                                                                                                                        |
| chromatin DNA binding                                                          | 4  | 0.094116 | KDM5A, NOTCH1, UTY, GRHL1                                                                                                                                                                                                                                                                      |

| GO biological process                                          | Count | P-Value  | Genes                                                                                                                                  |
|----------------------------------------------------------------|-------|----------|----------------------------------------------------------------------------------------------------------------------------------------|
| MAPK cascade                                                   | 20    | 0.000000 | MAP3K2, PPM1L, RIPK2, HGF, CAMK2A, IL5RA, GFRA1, RASAL2, NLK, EGFR, FGF5, DLG1, NRAS, ERBB4, PTPRA, TAOK1, TNK1, MAPK6, MAP3K7, SPTBN1 |
| axon guidance                                                  | 12    | 0.001042 | NRP2, NOTCH1, SEMA6A, CNTN6, PTPRA, DCC, NRXN1, LAMA3, GFRA1, CCDC141, SPTBN1, ROBO1                                                   |
| positive regulation of protein localization to plasma membrane | 6     | 0.001914 | CLIP3, DLG1, NRXN1, ZDHHC5, EGFR, SPTBN1                                                                                               |
| Wnt signaling pathway, calcium modulating pathway              | 5     | 0.002382 | AGO1, CAMK2A, PLCB1, NLK, MAP3K7                                                                                                       |
| protein stabilization                                          | 10    | 0.003800 | TBRG1, ATF7IP, USP13, MDM4, PARVA, ANK2, NLK, COA8, A1CF, STK3                                                                         |

|                                                                                |    |          |                                                                                                                                                                                                                                                              |
|--------------------------------------------------------------------------------|----|----------|--------------------------------------------------------------------------------------------------------------------------------------------------------------------------------------------------------------------------------------------------------------|
| protein phosphorylation                                                        | 17 | 0.005059 | MAP3K2, CAMK2A, DYRK1A, IRAK3, MMD2, NLK, STK3, NUA1, GRM5, SNRK, PTPRA, CAMK4, TAOK1, MAP3K20, TNIK, MAPK6, NEK11                                                                                                                                           |
| protein autophosphorylation                                                    | 9  | 0.006476 | ERBB4, CAMK4, TAOK1, CAMK2A, DYRK1A, IRAK3, TNIK, NLK, EGFR                                                                                                                                                                                                  |
| T cell activation                                                              | 5  | 0.007628 | CD4, DLG1, KIF13B, SLAMF6, NLRC3                                                                                                                                                                                                                             |
| negative regulation of calcium ion-dependent exocytosis                        | 3  | 0.007821 | TRIM9, SYT4, NOTCH1                                                                                                                                                                                                                                          |
| regulation of transcription, DNA-templated                                     | 26 | 0.007916 | USP13, KMT2D, FOXC1, NOTCH1, BNC2, PLAG1, RORA, ARID4B, NLK, GRM5, ATXN1, POM121C, RBBP4, ZNF569, ZNF764, ZKSCAN1, ATF7IP, NCOA2, ZFH3, PHF12, ESRRB, GTF2H3, SP1, ZNF737, ASXL3, PHF19                                                                      |
| intracellular signal transduction                                              | 15 | 0.008814 | NLRC3, IRAK3, NLK, STK3, PREX2, NUA1, SNRK, CHN2, CAMK4, TAOK1, DCX, TNIK, PLCB1, MAPK6, NEK11                                                                                                                                                               |
| positive regulation of synaptic transmission, glutamatergic                    | 4  | 0.009650 | NLGN3, NRXN1, EGFR, SHANK1                                                                                                                                                                                                                                   |
| positive regulation of transcription from RNA polymerase II promoter           | 30 | 0.009870 | ATF1, KMT2D, FOXC1, NOTCH1, PLAG1, ZNF292, GLIS3, RORA, ARID4B, FHL5, ZNF24, EGFR, KPNA6, NCOA2, ZFH3, POU2F1, RIPK2, HGF, ESRRB, CDC5L, AP3B1, GRHL1, SENP1, CNOT7, TNIP1, SP1, CCPC1, AGO1, ASXL3, MDM4                                                    |
| cellular response to granulocyte macrophage colony-stimulating factor stimulus | 3  | 0.011711 | CD4, ETV3, ZFP36L2                                                                                                                                                                                                                                           |
| regulation of NMDA receptor activity                                           | 4  | 0.012667 | DLG1, NRXN1, CAMK2A, OPRM1                                                                                                                                                                                                                                   |
| positive regulation of protein phosphorylation                                 | 9  | 0.014141 | FGF5, CLIP3, MOB1A, CD4, ERBB4, HGF, VEGFD, TNIK, EGFR                                                                                                                                                                                                       |
| learning                                                                       | 5  | 0.014152 | NLGN3, GRM5, ATXN1, NRXN1, PLCB1                                                                                                                                                                                                                             |
| positive regulation of transcription, DNA-templated                            | 19 | 0.014678 | KDM5A, ATF7IP, MAP3K2, ZFH3, FOXC1, NOTCH1, MSTN, ESRRB, DYRK1A, RORA, EGFR, WDR77, RAP2C, CD4, SP1, ERBB4, CAMK4, PLCB1, CREB5                                                                                                                              |
| protein import into nucleus                                                    | 6  | 0.016002 | NOTCH1, POM121C, KPNA6, FAM53C, KPNB1, STK3                                                                                                                                                                                                                  |
| nervous system development                                                     | 13 | 0.016199 | PRPS1, SEMA6A, DYRK1A, NAV1, GFRA1, ROBO1, FGF5, ATXN1, FRMD7, ERBB4, DCX, SRGAP2, FGF12                                                                                                                                                                     |
| dendritic spine development                                                    | 3  | 0.016277 | CAMK2A, ACSL4, SRGAP2                                                                                                                                                                                                                                        |
| positive regulation of interleukin-2 production                                | 4  | 0.017438 | CD4, RIPK2, MAP3K7, SPTBN1                                                                                                                                                                                                                                   |
| vascular endothelial growth factor signaling pathway                           | 3  | 0.024299 | FOXC1, NRP2, VEGFD                                                                                                                                                                                                                                           |
| negative regulation of stem cell differentiation                               | 3  | 0.024299 | NOTCH1, ESRRB, ZFP36L2                                                                                                                                                                                                                                       |
| vocalization behavior                                                          | 3  | 0.024299 | NLGN3, NRXN1, SHANK1                                                                                                                                                                                                                                         |
| activation of JUN kinase activity                                              | 4  | 0.024627 | MAP3K2, RIPK2, TAOK1, MAP3K20                                                                                                                                                                                                                                |
| negative regulation of skeletal muscle tissue growth                           | 2  | 0.030363 | MSTN, TLL2                                                                                                                                                                                                                                                   |
| response to magnetism                                                          | 2  | 0.030363 | TJP1, SOD2                                                                                                                                                                                                                                                   |
| resolution of meiotic recombination intermediates                              | 3  | 0.030369 | EME1, ERCC4, RMI1                                                                                                                                                                                                                                            |
| positive regulation of protein kinase B signaling                              | 8  | 0.030375 | FGF5, CALCR, ERBB4, NRXN1, HGF, PIK3AP1, EGFR, STK3                                                                                                                                                                                                          |
| activation of protein kinase activity                                          | 5  | 0.030412 | MOB1A, DLG1, TAOK1, TNIK, STK3                                                                                                                                                                                                                               |
| regulation of transcription from RNA polymerase II promoter                    | 37 | 0.031918 | ATF1, FOXC1, TSHZ1, ZNF292, GLIS3, RORA, ARID4B, ZNF24, EGFR, PURB, ZNF704, BBX, ZNF569, ZNF764, ZKSCAN1, ZFH3, POU2F1, TSC22D1, ESRRB, EBF1, ZFP69B, CDC5L, ETV3, GRHL1, SOD2, WDR77, SLTM, SP2, TNIP1, TAL2, SP1, ZNF737, ELF5, MDM4, BRWD1, ZNF652, CREB5 |
| cellular response to epidermal growth factor stimulus                          | 4  | 0.035053 | FOXC1, ERBB4, EGFR, ZFP36L2                                                                                                                                                                                                                                  |
| interleukin-12-mediated signaling pathway                                      | 4  | 0.035053 | HNRNP, PITPNA, PLCB1, SOD2                                                                                                                                                                                                                                   |
| regulation of small GTPase mediated signal transduction                        | 7  | 0.035778 | PREX2, TIAM2, CHN2, ARHGAP17, SRGAP2, ARHGAP5, SRGAP1                                                                                                                                                                                                        |
| stress-activated protein kinase signaling cascade                              | 3  | 0.036968 | TAOK1, TNIK, STK3                                                                                                                                                                                                                                            |
| ubiquitin-dependent protein catabolic process                                  | 10 | 0.038060 | CUL4A, RNF144A, USP13, USP15, USP38, USP49, SMURF2, CUL2, TRIP12, DTL                                                                                                                                                                                        |

|                                                                                                              |    |          |                                                                                     |
|--------------------------------------------------------------------------------------------------------------|----|----------|-------------------------------------------------------------------------------------|
| nucleotide-excision repair, DNA incision, 3'-to lesion                                                       | 3  | 0.040455 | CUL4A, ERCC4, GTF2H3                                                                |
| nucleotide-excision repair, preincision complex stabilization                                                | 3  | 0.040455 | CUL4A, ERCC4, GTF2H3                                                                |
| multicellular organism growth                                                                                | 5  | 0.044520 | TAL2, PLEKHA1, SP2, RMI1, PLAG1                                                     |
| secretory columnar luminal epithelial cell differentiation involved in prostate glandular acinus development | 2  | 0.045198 | NOTCH1, WDR77                                                                       |
| positive regulation of NF-kappaB transcription factor activity                                               | 7  | 0.049730 | TRIML2, DHX33, RIPK2, CAMK2A, ANKRD42, IRAK3, MAP3K7                                |
| cell-cell junction organization                                                                              | 3  | 0.051610 | TJP1, SDK1, XIRP2                                                                   |
| social behavior                                                                                              | 4  | 0.051936 | NLGN3, ATXN1, NRXN1, SHANK1                                                         |
| protein deubiquitination                                                                                     | 9  | 0.053383 | OTUD4, USP13, USP15, USP38, USP49, TNIP1, SMURF2, MDM4, MAP3K7                      |
| positive regulation of JNK cascade                                                                           | 5  | 0.058036 | RIPK2, TAOK1, TNIK, PLCB1, STK3                                                     |
| global genome nucleotide-excision repair                                                                     | 3  | 0.059582 | CUL4A, ERCC4, GTF2H3                                                                |
| endocardium development                                                                                      | 2  | 0.059806 | NOTCH1, STK3                                                                        |
| histone H2B conserved C-terminal lysine deubiquitination                                                     | 2  | 0.059806 | USP15, USP49                                                                        |
| positive regulation of ERK1 and ERK2 cascade                                                                 | 8  | 0.061366 | CD4, NOTCH1, CALCR, ERBB4, RIPK2, NRXN1, OPRM1, EGFR                                |
| positive regulation of excitatory postsynaptic potential                                                     | 3  | 0.063717 | NLGN3, NRXN1, SHANK1                                                                |
| negative regulation of myoblast differentiation                                                              | 3  | 0.063717 | ZFHX3, NOTCH1, MSTN                                                                 |
| outflow tract septum morphogenesis                                                                           | 3  | 0.063717 | NRP2, PARVA, ROBO1                                                                  |
| regulation of cytoskeleton organization                                                                      | 3  | 0.063717 | TJP1, TAOK1, CAPN2                                                                  |
| hippo signaling                                                                                              | 3  | 0.067945 | TJP1, MOB1A, STK3                                                                   |
| cytoskeleton organization                                                                                    | 6  | 0.068946 | ABLIM1, SEMA6A, MAP3K20, ANK2, TNIK, BRWD1                                          |
| hemopoiesis                                                                                                  | 4  | 0.069356 | CUL4A, CD164, SOD2, ZFP36L2                                                         |
| positive regulation of calcium ion transport                                                                 | 3  | 0.072263 | CAMK2A, ANK2, ATP2B1                                                                |
| toll-like receptor 2 signaling pathway                                                                       | 2  | 0.074192 | RIPK2, PIK3AP1                                                                      |
| cell-cell adhesion                                                                                           | 7  | 0.074614 | TJP1, DLG1, DCC, LAMA3, FAT3, LPP, EGFR                                             |
| neuron projection morphogenesis                                                                              | 4  | 0.074759 | TAOK1, TNIK, SRGAP2, EGFR                                                           |
| JNK cascade                                                                                                  | 4  | 0.074759 | RIPK2, MAP3K20, FGF12, MAP3K7                                                       |
| positive regulation of viral genome replication                                                              | 3  | 0.076668 | NOTCH1, CNOT7, IFIT1                                                                |
| adult behavior                                                                                               | 3  | 0.076668 | NLGN3, NRXN1, SHANK1                                                                |
| calcium ion regulated exocytosis                                                                             | 3  | 0.076668 | SYT4, ARHGAP17, SYN2                                                                |
| negative regulation of protein kinase B signaling                                                            | 4  | 0.077529 | DLG1, MSTN, PLEKHA1, XDH                                                            |
| synapse assembly                                                                                             | 4  | 0.080344 | NLGN3, SDK1, ERBB4, NRXN1                                                           |
| extracellular matrix disassembly                                                                             | 4  | 0.083202 | MMP16, CAPN2, TLL2, KLK7                                                            |
| post-embryonic development                                                                                   | 4  | 0.083202 | CHST11, TAL2, PLEKHA1, SOD2                                                         |
| regulation of catalytic activity                                                                             | 11 | 0.084298 | PREX2, MMP16, FRMD7, AP3B1, ARHGAP17, STXBP5, PLCB1, SOD2, ARHGAP5, SRGAP1, STXBP5L |
| sprouting angiogenesis                                                                                       | 3  | 0.085720 | NOTCH1, VEGFD, PARVA                                                                |
| intrinsic apoptotic signaling pathway                                                                        | 3  | 0.085720 | CUL4A, CUL2, COA8                                                                   |
| mesenchymal cell development                                                                                 | 2  | 0.088359 | FOXC1, NOTCH1                                                                       |
| circadian regulation of gene expression                                                                      | 4  | 0.089047 | KDM5A, NCOA2, ZFHX3, RORA                                                           |

|                                                      |    |          |                                                                                   |
|------------------------------------------------------|----|----------|-----------------------------------------------------------------------------------|
| protein dephosphorylation                            | 6  | 0.089931 | DLG1, CTDPI, PPM1L, PTPRA, CTDSPL, CTTNBP2NL                                      |
| protein localization to plasma membrane              | 6  | 0.089931 | DLG1, FYB1, FCHO2, ANK2, TNIK, SPTBN1                                             |
| MyD88-dependent toll-like receptor signaling pathway | 3  | 0.090362 | TNIP1, IRAK3, MAP3K7                                                              |
| regulation of MAPK cascade                           | 3  | 0.090362 | TAOK1, TNIK, STK3                                                                 |
| negative regulation of cell proliferation            | 12 | 0.093901 | TBRG1, CD164, NOTCH1, CNOT7, RBBP4, ERBB4, MDM4, OPRM1, ETV3, SOD2, CBFA2T3, STK3 |
| fat cell differentiation                             | 4  | 0.095060 | CLIP3, LRRC8C, BBS9, PLCB1                                                        |
| protein K48-linked deubiquitination                  | 3  | 0.095075 | OTUD4, USP13, USP15                                                               |
| cell cycle                                           | 10 | 0.099845 | TBRG1, UHRF2, RBBP4, CCPG1, ENSA, MAP3K20, CDC5L, MAPK6, SMC4, TTC28              |

| KEGG Pathway                        | Count | P-Value  | Genes                                                                                  |
|-------------------------------------|-------|----------|----------------------------------------------------------------------------------------|
| MAPK signaling pathway              | 13    | 0.004391 | MAP3K2, HGF, VEGFD, NLK, EGFR, STK3, FGF5, NRAS, CACNB4, ERBB4, TAOK1, MAP3K20, MAP3K7 |
| Calcium signaling pathway           | 11    | 0.007918 | FGF5, GRM5, ERBB4, HGF, CAMK4, CAMK2A, VEGFD, ATP2B1, PLCB1, EGFR, TRDN                |
| Gap junction                        | 6     | 0.017113 | TJP1, MAP3K2, GRM5, NRAS, PLCB1, EGFR                                                  |
| Aldosterone synthesis and secretion | 6     | 0.025944 | ATF1, CAMK4, CAMK2A, ATP2B1, PLCB1, CREB5                                              |
| Long-term potentiation              | 5     | 0.027302 | GRM5, NRAS, CAMK4, CAMK2A, PLCB1                                                       |
| Estrogen signaling pathway          | 7     | 0.030617 | NCOA2, NRAS, SP1, OPRM1, PLCB1, EGFR, CREB5                                            |
| Hippo signaling pathway - fly       | 5     | 0.031418 | MOB1A, DLG1, TSHZ1, LPP, STK3                                                          |
| Axon guidance                       | 8     | 0.036152 | NRAS, ABLIM1, SEMA6A, DCC, CAMK2A, SRGAP2, SRGAP1, ROBO1                               |
| Nucleocytoplasmic transport         | 6     | 0.037267 | POM121C, TMEM33, MAGOH, SUMO2, KPNA6, KPNB1                                            |
| Oxytocin signaling pathway          | 7     | 0.048120 | NRAS, CACNB4, CAMK4, CAMK2A, PPP1R12B, PLCB1, EGFR                                     |
| Cushing syndrome                    | 7     | 0.049383 | KMT2D, SP1, CAMK2A, PLCB1, KCNK2, EGFR, CREB5                                          |
| Focal adhesion                      | 8     | 0.056365 | HGF, LAMA3, CAPN2, VEGFD, PARVA, PPP1R12B, ARHGAP5, EGFR                               |
| GnRH signaling pathway              | 5     | 0.074504 | MAP3K2, NRAS, CAMK2A, PLCB1, EGFR                                                      |
| Dorso-ventral axis formation        | 3     | 0.077056 | NOTCH1, CPEB2, EGFR                                                                    |
| Cortisol synthesis and secretion    | 4     | 0.099392 | SP1, PLCB1, KCNK2, CREB5                                                               |

**Supplementary Table S3.** The expression of miR-1290 in different cancers and its biological effect.

| miR-1290          |                |                                                                                                                           |                                                                                                                                                                                                                                                                                                                                                                                                                                                                                                                                                          |           |
|-------------------|----------------|---------------------------------------------------------------------------------------------------------------------------|----------------------------------------------------------------------------------------------------------------------------------------------------------------------------------------------------------------------------------------------------------------------------------------------------------------------------------------------------------------------------------------------------------------------------------------------------------------------------------------------------------------------------------------------------------|-----------|
| Type of cancer    | Expression     | Source/Experimental models                                                                                                | Biological effect of miR-1290                                                                                                                                                                                                                                                                                                                                                                                                                                                                                                                            | Reference |
| Colorectal cancer | Overexpression | SW480 and HT-29 colorectal cancer (CRC) cells and tissues                                                                 | miR-1290 initiates and promotes progression of the tumor by targeting 3' UTRs of <i>INPP4B</i> , a negative regulator of PI3K/Akt signaling pathway; miR-1290 promotes proliferation of CRC cells by inhibiting expression of cyclin-dependent kinase inhibitor (p27) and increasing expression of cyclin D1                                                                                                                                                                                                                                             | [145,146] |
|                   | Overexpression | CRC tissues, SW620 cell line                                                                                              | miR-1290 activates pro-survival pathways such as Akt and NF-κB to maintain proliferation of CRC cells; miR-1290 impairs cytokinesis by targeting <i>KIF13B</i> that generates multinucleated cells; Activation of Wnt and NF-κB pathways promotes transcription of miR-1290 and maintains CRC cell proliferation; Upregulation of reprogramming-related transcription factors such as c-Myc and Nanog in miR-1290-expressing cells                                                                                                                       | [150]     |
|                   | Overexpression | CRC tissues, SW480-5FU <sub>res</sub> , HCT116-5FU <sub>res</sub> cell lines, <i>in vivo</i> CRC xenografts mouse model   | miR-1290 inhibits expression of <i>hMSH2</i> ; miR-1290 reduces the sensitivity of CRC cells to 5-FU <i>in vitro</i> ; miR-1290 is positively correlated with dMMR status and predicts poor prognosis in patients with stage II and III CRC who received 5-FU chemotherapy                                                                                                                                                                                                                                                                               | [123]     |
|                   | Downregulation | SW480-5FU <sub>res</sub> cell line; Murine tumor model                                                                    | miR-1290 increases sensitivity to 5-FU treatment by direct targeting of hMSH2 and induces apoptosis <i>in vitro</i> and <i>in vivo</i>                                                                                                                                                                                                                                                                                                                                                                                                                   |           |
|                   | Overexpression | Caco-2 cell line                                                                                                          | Overexpression of miR-1290 in KRAS-wild type CRC cell line sensitive to sorafenib inhibits cell growth through S-phase cell cycle arrest                                                                                                                                                                                                                                                                                                                                                                                                                 | [154]     |
|                   | Overexpression | Primary CRC and colorectal liver metastasis                                                                               | miR-1290 is upregulated in liver metastasis in comparison to primary CRC; <i>In silico</i> prediction shows different targets for miR-1290 for example <i>AXL</i> involved in cell growth, invasion, metastasis, EMT, angiogenesis, drug resistance and stem cell maintenance; <i>CFLAR</i> encoding an important regulatory protein in extrinsic apoptotic pathway; <i>GAS7</i> responsible for maintaining microtubule stability and polarization, or <i>TMX4</i> acting as endoplasmic reductase required in protein folding and degradation pathways | [156–160] |
|                   | Overexpression | Plasma, CRC tissues                                                                                                       | miR-1290 is overexpressed in CRC tissues in comparison to normal mucosa; Circulating miR-1290 is a novel promising biomarker for the early detection of CRC                                                                                                                                                                                                                                                                                                                                                                                              | [124]     |
|                   | Overexpression | Serum-derived exosomes                                                                                                    | miR-1290 is useful in the differentiation of patients at stage I CRC from healthy controls                                                                                                                                                                                                                                                                                                                                                                                                                                                               | [125]     |
|                   | Overexpression | Serum and tissue specimens; LoVo and HT29 cell lines                                                                      | Serum miR-1290 shows a potential to separate healthy individuals from patients with neoplasia (CRC and adenoma); Serum miR-1290 is an independent prognostic biomarker for predicting poorer overall survival (OS) in CRC patients and a predictor of tumor recurrence after surgery; miR-1290 is upregulated in CRC and adenoma tissues in comparison to healthy individuals; CRC cell lines overexpress miR-1290 and secrete it into the culture medium; miR-1290 contributes to the proliferation, migration and invasion <i>in vitro</i>             | [126]     |
| Pancreatic cancer | Overexpression | PanIN-1, PanIN-3 and pancreatic ductal adenocarcinoma (PDAC) tissues; Plasma; AsPC-1 and PANC-1 cells; Murine tumor model | Significant changes in miR-1290 expression in PanIN-3 and PDAC tissues in comparison to PanIN-1 confirms its involvement at early stage of pancreatic carcinogenesis; Circulating miR-1290 has potential diagnostic value for PDAC; High plasma miR-1290 is correlated with histological differentiation, pT stage, lymph node metastasis; miR-1290 promotes proliferation, migration and invasion <i>in vitro</i> and <i>in vivo</i> ; 3'UTR of <i>IKK1</i> is a direct target for miR-1290                                                             | [167]     |
|                   | Overexpression | Blood                                                                                                                     | High levels of miR-1290 predict poor OS in pancreatic cancer patients                                                                                                                                                                                                                                                                                                                                                                                                                                                                                    | [170]     |

|                   |                |                                                                                                                                            |                                                                                                                                                                                                                                                                                                                                                                                                                                                                                                           |           |
|-------------------|----------------|--------------------------------------------------------------------------------------------------------------------------------------------|-----------------------------------------------------------------------------------------------------------------------------------------------------------------------------------------------------------------------------------------------------------------------------------------------------------------------------------------------------------------------------------------------------------------------------------------------------------------------------------------------------------|-----------|
|                   | Overexpression | Plasma                                                                                                                                     | High miR-1290 expression in older and male PDAC patients in comparison to healthy controls                                                                                                                                                                                                                                                                                                                                                                                                                | [171]     |
|                   | Overexpression | Serum                                                                                                                                      | miR-1290 in combination with CA 19-9 improves diagnostic accuracy of PDAC                                                                                                                                                                                                                                                                                                                                                                                                                                 | [129]     |
|                   | Overexpression | Exosomes derived from Panc-1 and SUIT-2 cell lines; Human primary pancreatic stellate cells (PSCs) isolated from pancreatic cancer tissues | Exosomes containing miR-1290 induce <i>ACTA2</i> and fibrosis-related genes in PSCs which favors tumorigenesis; Exosomes increase proliferation and migration of PSCs                                                                                                                                                                                                                                                                                                                                     | [172]     |
| Gastric cancer    | Overexpression | Serum-derived exosomes; SGC 7901 and AGS cell lines                                                                                        | Enhanced proliferation, migration and invasion of gastric cancer (GC) cells observed after incubation with exosomes rich in miR-1290 via targeting <i>NKDI</i>                                                                                                                                                                                                                                                                                                                                            | [185]     |
|                   | Overexpression | Human tissue specimens; Tumor-derived extracellular vesicles; MGC-803, GCL-1 and MFC cell lines; Murine tumor model                        | miR-1290 in extracellular vesicles secreted from GC cells contributes to immune escape through Grhl2/ZEB1/PDL-1 axis resulting in immune escape <i>in vitro</i> and <i>in vivo</i>                                                                                                                                                                                                                                                                                                                        | [187]     |
| Liver cancer      | Overexpression | Serum-derived exosomes; Tumor tissues; HUVEC, HepG2 and SMMC-7221 cell lines                                                               | miR-1290 is highly expressed in serum-derived exosomes from hepatocellular carcinoma (HCC) patients, tumor tissues, and HCC cell lines; <i>SMEK1</i> is a direct target of miR-1290 in HUVEC cell line; miR-1290 exerts proangiogenic properties <i>in vitro</i> and <i>in vivo</i> ; miR-1290 is determined as a potential target of HCC therapy                                                                                                                                                         | [196]     |
|                   | Overexpression | Plasma                                                                                                                                     | Upregulation of circulating miR-1290 observed in recurrent recipients after liver transplantation, predicts poor OS and disease-free survival (DFS)                                                                                                                                                                                                                                                                                                                                                       | [199]     |
|                   | Downregulation | HepG2 cells                                                                                                                                | Paclitaxel reduces expression of miR-1290; miR-1290 inhibits proliferation and enhances apoptosis <i>in vitro</i> ; Putative targets for miR-1290 ( <i>RAS</i> , <i>PI3K</i> , <i>PTEN</i> , <i>ECM</i> , <i>ITGB</i> , <i>c-myc</i> ) are involved in PI3K/Akt signaling; Manipulation of miRNA level may serve as an important approach in paclitaxel therapy                                                                                                                                           | [201]     |
| Esophageal cancer | Overexpression | Tumor tissues                                                                                                                              | miR-1290 is upregulated in esophageal squamous cell carcinoma (ESCC) tissues compared to noncancerous esophageal mucosa; Overexpression of miR-1290 and low level of its target <i>NFIX</i> are significantly associated with positive lymph node metastasis, advanced tumor stage, short OS and DFS of ESCC patients                                                                                                                                                                                     | [130]     |
|                   | Overexpression | KYSE410 and ECA 109 cells                                                                                                                  | Overexpression of miR-1290 significantly downregulates <i>NFIX</i> levels which promotes proliferation, migration and invasion <i>in vitro</i>                                                                                                                                                                                                                                                                                                                                                            | [212]     |
|                   | Overexpression | Tumor tissues; ECA 109 and TE13 cells                                                                                                      | miR-1290 overexpressed in ESCC tissues in comparison to adjacent normal mucosa is associated with tumor differentiation, N classification, and tumor-node metastasis stage in ESCC patients; miR-1290 enhances proliferation, migration, invasion, and downregulates expression of suppressor of cancer cell invasion (SCAI) <i>in vitro</i>                                                                                                                                                              | [213]     |
|                   | Overexpression | Serum                                                                                                                                      | High serum miR-1290 levels may discriminate ESCC patients from healthy controls and reflect progression of ESCC                                                                                                                                                                                                                                                                                                                                                                                           | [214]     |
| Lung cancer       | Overexpression | Tissue                                                                                                                                     | miR-1290 is overexpressed in small-cell lung cancer (SCLC) tissues in comparison to normal lung tissue; miR-1290 is overexpressed in non-small-cell lung cancer (NSCLC) tissues in comparison to normal adjacent tissues                                                                                                                                                                                                                                                                                  | [218,219] |
|                   | Overexpression | Tissue, serum; A549, cell line; Murine tumor model                                                                                         | miR-1290 is a crucial driver for tumor initiation, progression and metastasis; <i>MTIG</i> is a direct target for miR-1290; Serum miR-1290 levels increased in stage I-III NSCLC patients compared with healthy individuals; Circulating miR-1290 corresponds with the response of patients ongoing EGFR tyrosine kinase inhibitor (TKI) treatment, and in some instances followed by either radio- or chemotherapy; Inhibition of miR-1290 with administration of locked nucleic acids (LNA) arrests the | [220]     |

|               |                                  |                                                       |                                                                                                                                                                                                                                                                                                                                                                                                                                                                                                                                                      |       |
|---------------|----------------------------------|-------------------------------------------------------|------------------------------------------------------------------------------------------------------------------------------------------------------------------------------------------------------------------------------------------------------------------------------------------------------------------------------------------------------------------------------------------------------------------------------------------------------------------------------------------------------------------------------------------------------|-------|
|               |                                  |                                                       | growth of tumor <i>in vivo</i> ; miR-1290 is clinically useful as biomarker of disease progression and as a therapeutic target                                                                                                                                                                                                                                                                                                                                                                                                                       |       |
|               | Downregulation                   | A549 and HCC1588 cells                                | Inhibition of miR-1290 decreases stemness and EMT markers in NSCLC and suppresses proliferation, sphere-formation, colony formation and invasion of NSCLC                                                                                                                                                                                                                                                                                                                                                                                            | [221] |
|               | Downregulation                   | Murine tumor model                                    | AntagomiR-1290 suppresses NSCLC volume and weight initiated by CD133-positive cells <i>in vivo</i> ; AntagomiR-1290 inhibits proliferation, clonogenicity, invasion and migration of CD13-positive cells by targeting fyn-related Src family tyrosine kinase                                                                                                                                                                                                                                                                                         | [222] |
|               | Overexpression<br>Downregulation | Tissues; A549 and H460 cell lines; Murine tumor model | Upregulation of miR-1290 in NSCLC tissues in comparison to normal adjacent tissue; Upregulation of miR-1290 in NSCLC cells; High miR-1290 levels are closely related to negative lymph node metastasis and advanced clinical stage (stage III); miR-1290 targets IRF2 and stimulates proliferation, colony formation, and invasion; miR-1290 enhances expression of cell cycle proteins (CDK2, CDK4) and stimulates EMT by upregulating N-cadherin and downregulating E-cadherin; Antagomir-1290 reduces tumor size and growth volume <i>in vivo</i> | [223] |
|               | Overexpression                   | Tissues; A549, SPC-A1; Murine tumor model             | miR-1290 promotes proliferation, cell cycle progression, invasion and inhibits apoptosis in lung adenocarcinoma (LADC) cells; miR-1290 promotes tumor growth, invasion and metastasis <i>in vivo</i> ; miR-1290 targets SOCS4 and activates JAK/STAT3 and PI3K/Akt signaling pathways; SOCS4 is downregulated in LADC tissues in comparison to matched noncancerous lung tissues and correlates with poor clinical outcome                                                                                                                           | [224] |
|               | Downregulation                   | A549 cells                                            | <i>Polygonatum odoratum</i> lectin induces autophagy and apoptosis by downregulation of miR-1290 through inactivation of Wnt/ $\beta$ -catenin pathway; <i>GSK3<math>\beta</math></i> a direct downstream target of miR-1290 is upregulated                                                                                                                                                                                                                                                                                                          | [225] |
|               | Overexpression                   | A549 cells                                            | miR-1290 is a regulator of asiatic acid-induced apoptosis by targeting <i>BCL2</i> mRNA <i>in vitro</i>                                                                                                                                                                                                                                                                                                                                                                                                                                              | [226] |
|               | Overexpression                   | Tissues and serum                                     | miR-1290 is upregulated in NSCLC tissues in comparison to non-tumor adjacent tissues; miR-1290 is positively correlated with high tumor stage and lymph node metastasis; miR-1290 levels are higher in NSCLC patients than in those with benign lung disease and healthy controls; miR-1290 is upregulated in serum of NSCLC patients with high TNM stage and positive lymph node metastasis; High serum miR-1290 levels predict poor survival                                                                                                       | [131] |
|               | Overexpression                   | Serum exosomes                                        | miR-1290 is significantly higher in LADC patients than in healthy controls and it is associated with tumor stage, tumor size, lymph node metastasis and distant metastasis; Diagnostic efficacy of miR-1290 is higher than CEA, CYFRA21-1 and NSE; LADC patients with high miR-1290 levels have poorer progression-free survival (PFS) than those with low miR-1290 levels                                                                                                                                                                           | [132] |
|               | Overexpression                   | Tissues                                               | miR-1290 is a predictive biomarker for response to platinum-based chemotherapy in advanced NSCLC                                                                                                                                                                                                                                                                                                                                                                                                                                                     | [229] |
|               | Overexpression                   | Tissues                                               | miR-1290 predicts response to platinum-based doublet chemotherapy in patients with LADC recurring after initial surgical resection                                                                                                                                                                                                                                                                                                                                                                                                                   | [230] |
| Breast cancer | Overexpression                   | Exosomes                                              | High expression of miR-1290 is present in breast cancer (BC) patients in comparison to healthy subjects; miR-1290 is associated with lymph node metastasis and advanced stage of BC (TNM II/III vs I)                                                                                                                                                                                                                                                                                                                                                | [234] |
|               | Overexpression                   | Plasma and serum                                      | Higher miR-1290 expression detected in BC patients than in healthy individuals; Expression of miR-1290 is higher in stages I-III than in stage IV and in HER-2 positive and triple-negative breast cancer (TNBC) subtypes                                                                                                                                                                                                                                                                                                                            | [235] |

|                    |                |                                                                       |                                                                                                                                                                                                                                                                                                                                                                                                                                 |       |
|--------------------|----------------|-----------------------------------------------------------------------|---------------------------------------------------------------------------------------------------------------------------------------------------------------------------------------------------------------------------------------------------------------------------------------------------------------------------------------------------------------------------------------------------------------------------------|-------|
|                    | Downregulation | Tissues; MCF-7 and T47D cell lines                                    | Lower expression of miR-1290 in ER (high) Ki67 (low) BC is associated with tumor grade and correlated with better prognosis; miR-1290 targets <i>FOXA1</i> and <i>NAT1</i> ; <i>NAT1</i> positively correlates with ER and progesterone expression, and is negatively correlated with tumor size and grade;                                                                                                                     | [236] |
|                    | Downregulation | Tissues                                                               | miR-1290 is downregulated in TNBC subtype; miR-1290 targets <i>FOXA1</i> and <i>BMP4</i> ; miR-1290 signature is associated with poor prognosis                                                                                                                                                                                                                                                                                 | [238] |
| Cervical cancer    | Overexpression | Serum                                                                 | miR-1290 is upregulated in cervical cancer (CC) patients in comparison to healthy controls; miR-1290 expression increases along with CC stage                                                                                                                                                                                                                                                                                   | [133] |
|                    | Overexpression | HeLa-NGDR2, HeLa-R11 and Siha-R15 cell lines                          | miR-1290 is elevated in radioresistant cells; Expression of miR-1290 can be stimulated by radiation treatment that increases cells' survival                                                                                                                                                                                                                                                                                    | [243] |
|                    | Overexpression | CaSKi, HeLa and Siha cell lines; Tissues                              | miR-1290 is upregulated in cells with HPV infection upon 5'-aza-2'-deoxycytidine treatment; Upregulation of miR-1290 may be associated with DNA methylation status                                                                                                                                                                                                                                                              | [245] |
| Endometrial cancer | Overexpression | Plasma                                                                | miR-1290 is upregulated in plasma from high-grade endometrial cancer patients in comparison to controls                                                                                                                                                                                                                                                                                                                         | [134] |
| Ovarian cancer     | Overexpression | HeyA8 and TYK-nu -derived exosomes; Serum                             | Level of miR-1290 is higher in exosomes collected from the culture media of HeyA8 and TYK-nu cells (high-grade serous ovarian carcinoma (HGSC) cells) than in immortalized ovarian surface epithelium cells; miR-1290 is upregulated in HGSC serum samples in comparison to healthy controls; miR-1290 can discriminate HGSC from malignancies of other histological types                                                      | [135] |
|                    | Overexpression | Ascitic fluid and ascites-derived lavage; Plasma                      | Increased miR-1290 in HGSC, mucinous and endometrioid ovarian cancer (OC) especially at advanced stages; OC ascites-derived miR-1290 is overexpressed relative to the control plasma from the healthy postmenopausal women                                                                                                                                                                                                      | [136] |
|                    | Overexpression | Tissues                                                               | miR-1290 is higher in recurrent serous OC than in the primary OC                                                                                                                                                                                                                                                                                                                                                                | [251] |
|                    | Overexpression | Tissues                                                               | Upregulation of miR-1290 in epithelial OC than in normal oviduct tissues                                                                                                                                                                                                                                                                                                                                                        | [252] |
|                    | Downregulation | Tissues; OVCAR and SKOV-3                                             | Downregulation of miR-1290 by long-noncoding RNA <i>CCAT1</i> promotes proliferation of OC cells                                                                                                                                                                                                                                                                                                                                | [253] |
|                    | Overexpression | Plasma                                                                | Elevated miR-1290 in presurgical OC plasma is a predictor of favorable OS; Level of miR-1290 decreases after surgery and chemotherapy, also in long overall survivors                                                                                                                                                                                                                                                           | [254] |
| Prostate cancer    | Downregulation | Tissues                                                               | miR-1290 is slightly lower in prostate cancer (PCa) than in benign prostatic hyperplasia (BPH) and there is no difference between castrate-resistant prostate cancer (CRPC) and BPH                                                                                                                                                                                                                                             | [256] |
|                    | Overexpression | Urinary extracellular vesicles                                        | miR-1290 is significantly increased in PCa patients compared to BPH patients and it is associated with metastatic disease                                                                                                                                                                                                                                                                                                       | [260] |
|                    | Overexpression | Plasma exosomes                                                       | miR-1290 is associated with poor OS in CRPC                                                                                                                                                                                                                                                                                                                                                                                     | [259] |
|                    | Overexpression | Serum                                                                 | Five miRNAs coupled with miR-1290 (2-miRNA model) increase diagnostic value in early detection of PCa                                                                                                                                                                                                                                                                                                                           | [258] |
| Oral cancer        | Overexpression | Tissues; Cal-27, SCC-9, SCC-25, and Tca-8113 cell lines               | miR-1290 expression is higher in oral squamous cell carcinoma (OSCC) tissues than in normal tissues and in Cal-27, SCC-9, SCC-25, and Tca-8113 cell lines in comparison to normal human oral keratinocytes; High level of miR-1290 is associated with TNM stage, lymph node metastasis and shorter OS in OSCC patients; Upregulation of miR-1290 promotes migration, invasion and EMT <i>in vitro</i> by targeting <i>CCNG2</i> | [261] |
|                    | Downregulation | Plasma                                                                | Low level of miR-1290 in OSCC patients is related to clinical stage, differentiation degree, tumor diameter, lymph node metastasis, low PFS and OS                                                                                                                                                                                                                                                                              | [137] |
|                    | Downregulation | Plasma; SAS and clinically relevant radioresistant cell lines (SAS-R) | Low miR-1290 in OSCC patients and in SAS cells in comparison to SAS-R cell line; The frequency of low-miR-1290 is higher in OSCC patients with low tumor                                                                                                                                                                                                                                                                        | [138] |

|                       |                |                                                                        |                                                                                                                                                                                                                                                                                                                                                                                                                                                                               |       |
|-----------------------|----------------|------------------------------------------------------------------------|-------------------------------------------------------------------------------------------------------------------------------------------------------------------------------------------------------------------------------------------------------------------------------------------------------------------------------------------------------------------------------------------------------------------------------------------------------------------------------|-------|
|                       |                |                                                                        | differentiation, poor response to preoperative chemoradiotherapy, and it is also associated with shorter OS and DFS                                                                                                                                                                                                                                                                                                                                                           |       |
| Laryngeal cancer      | Overexpression | Tissues                                                                | miR-1290 is upregulated in supraglottic laryngeal squamous cell carcinoma (LaSCC) in comparison to matched normal mucosa and differentially expressed in supraglottic LaSCC with and without metastasis                                                                                                                                                                                                                                                                       | [264] |
|                       | Overexpression | Tissues; LaSCC cell lines                                              | miR-1290 targets 3'UTR of <i>MAF</i> mRNA; <i>MAF</i> protein distribution shows loss of <i>MAF</i> nuclear expression or complete absence in LaSCC samples in comparison to nuclear and cytoplasmic expression in normal mucosa                                                                                                                                                                                                                                              | [267] |
|                       | Overexpression | Exosomes derived from AMC-HN-8 cell line                               | AMC-HN-8 cells are able to release miRNA-containing exosomes including miR-1290 in comparison to parental cells                                                                                                                                                                                                                                                                                                                                                               | [268] |
| Cutaneous cancer      | Overexpression | Serum and tissues; cutaneous squamous cell carcinoma (CSCC) cell lines | miR-1290 is upregulated in tumor tissue and serum in organ transplant recipients with CSCC and in the supernatants of CSCC cell lines in comparison to cultured primary keratinocytes; Dysregulated miR-1290 in tissue is reflected in serum in patients without advanced disease and highly differentiated tumor; Circulating miR-1290 may serve as a promising tool in prediction, diagnosis and early detection of metastases in patients after excision of high-risk CSCC | [271] |
| Brain cancer          | Overexpression | Tissues; LN-229 and U87 cell lines; Tumor mice model                   | miR-1290 is elevated in glioma samples compared to normal brain samples; miR-1290 targets <i>LHX6</i> and promotes proliferation and metastasis of cancer cells; Inhibition of <i>LHX6</i> expression promotes tumor growth <i>in vivo</i>                                                                                                                                                                                                                                    | [272] |
|                       | Overexpression | U87 cell line                                                          | miR-1290 increases cell proliferation, migration, invasion and resistance to chemoradiation by targeting 3' UTR of <i>SOCS4</i> mRNA; miR-1290 is a promising therapeutic target for glioblastoma therapy                                                                                                                                                                                                                                                                     | [273] |
|                       | Overexpression | Tissues; LN229 and A172 cell lines; Tumor mice model                   | miR-1290 is overexpressed in glioma tissues compared to normal brain samples; miR-1290 targets 3'UTR of <i>FBXW7</i> mRNA; circBRAF (circular RNA) serves as a molecular sponge for miR-1290; Upregulation of circBRAF suppresses the development of glioma <i>in vitro</i> and <i>in vivo</i> by regulation of miR-1290/ <i>FBXW7</i> axis                                                                                                                                   | [275] |
|                       | Overexpression | Tissues; T98G and LN18 cell lines; Tumor mice model                    | miR-1290 interacts with 3' UTR of <i>RORA</i> ; miR-1290 is a target of circRELN in glioma cells; Sevoflurane blocks the development of malignant glioma by upregulation of circRELN through circRELN-mediated miR-1290/ <i>RORA</i> axis                                                                                                                                                                                                                                     | [276] |
|                       | Overexpression | Tissues; Pediatric glioma stem cells (GSCs); Exosomes of GSCs          | GSCs secrete exosomes rich in miR-1290 that alters expression of genes involved in tumorigenesis in recipient cells (normal neural stem cells, NSCs)                                                                                                                                                                                                                                                                                                                          | [277] |
| Leukemia              | Overexpression | Tissues; SUP-B15 cells                                                 | Resveratrol targets miR-1290 and inhibits cell proliferation, migration, induces cell-cycle arrest and apoptosis in B-cell acute lymphoblastic leukemia (B-ALL); miR-1290 targets 3'UTR of <i>IGFBP3</i> which level is decreased in ALL patients                                                                                                                                                                                                                             | [278] |
|                       | Overexpression | Tissues                                                                | miR-1290 predicts shorter DFS in pediatric patients with B-ALL                                                                                                                                                                                                                                                                                                                                                                                                                | [280] |
| Conjunctival melanoma | Downregulation | Tissues                                                                | miR-1290 is downregulated in primary conjunctival melanoma with subsequent metastatic spread in comparison to nonmetastatic tumors                                                                                                                                                                                                                                                                                                                                            | [281] |
